20 **Abstract**

21 Sexually dimorphic behavior is pervasive across animals, with males and females  
22 exhibiting different mate selection, parental care, foraging, dispersal, and territorial  
23 strategies. However, the genetic underpinnings of sexually dimorphic behaviors are  
24 poorly understood. Here we investigate gene networks and expression patterns associated  
25 with sexually dimorphic imprinting-like learning in the butterfly *Bicyclus anynana*. In  
26 this species, both males and females learn visual preferences, but learn preferences for  
27 different traits and use different signals as salient, unconditioned cues. To identify genes  
28 and gene networks associated with this behavior, we examined gene expression profiles  
29 of the brains and eyes of male and female butterflies immediately post training and  
30 compared them to the same tissues of naïve individuals. We found more differentially  
31 expressed genes and a greater number of significant gene networks in the eye, indicating  
32 a role of the peripheral nervous system in visual imprinting-like learning. Females had  
33 higher chemoreceptor expression levels than males, supporting the hypothesized sexual  
34 dimorphic use of chemical cues during the learning process. In addition, genes that  
35 influence *B. anynana* wing patterns (sexual ornaments), such as *invected*, *spalt*, and  
36 *apterous*, were also differentially expressed in the brain and eye, suggesting that these  
37 genes may influence both sexual ornaments and the preferences for these ornaments. Our  
38 results indicate dynamic and sex-specific responses to social scenario in both the  
39 peripheral and central nervous systems and highlight the potential role of wing patterning  
40 genes in mate preference and learning across the Lepidoptera.

41

42 **Key words:** mate choice; sexual imprinting; butterfly; transcriptomics; wing patterning

43

## 44 **Introduction**

45        Sexually dimorphic behavior is pervasive across animal taxa. Males and females  
46 may exhibit different mate selection strategies (Byrne and Rice, 2006; Kokko and  
47 Johnstone, 2002; Talyn and Dowse, 2004), parental care behavior (Trivers, 1972; Zilkha  
48 et al., 2017), foraging strategies (Ehl et al., 2018; Quillfeldt et al., 2011; Shannon et al.,  
49 2006), dispersal (reviewed in (Greenwood, 1980; Trochet et al., 2016)), and territorial  
50 displays (Reedy et al., 2017; Rosell and Thomsen, 2006). Though pervasive across  
51 species and context, the genetic underpinnings of many types of sexually dimorphic  
52 behavior are poorly understood. This is partially because males and females carry much  
53 of the same genetic material; thus, sex-specific behavior is unlikely to be allele  
54 dependent, except for the rare behaviors that are primarily associated with genes of large  
55 effect on the sex chromosome. And, because behaviors are notoriously complex traits,  
56 even sexually dimorphic behaviors influenced by genes of large effect on the sex  
57 chromosome are likely to also be influenced by autosomal genes of minor effect  
58 (Edwards et al., 2009; Lande, 1980).

59        Substantial headway has been made in elucidating the hormones and genes that  
60 act as master regulators of sexually dimorphic traits and behaviors in model systems.  
61 Sex-specific steroid hormone production is associated with sexually dimorphic behaviors  
62 such as song production in song birds (Alward et al., 2013; Gurney and Konishi, 1980),  
63 aggression in mammals (reviewed in (Hashikawa et al., 2018)), and spawning in fish  
64 (Pradhan and Olsson, 2015). Similarly, sex-specific alternative splicing of master  
65 regulator genes, such as *doublesex*, is associated with sexually dimorphic morphology

66 and behavior in arthropods (Kunte et al., 2014; Rideout et al., 2007; Rodriguez-Caro et  
67 al., 2021; Wang et al., 2020). However, hormones and genes such as *doublesex* are often  
68 upstream master regulators, and the presumably sexually dimorphic downstream gene  
69 networks associated with hormone- and *doublesex*-related behaviors remain largely  
70 unknown, outside of courtship initiation in the fruit fly *Drosophila melanogaster* (Datta  
71 et al., 2008; Ruta et al., 2010) and song production in the zebra finch *Taeniopygia guttata*  
72 (Olson et al., 2015; Woodgate et al., 2014) and the canary *Serinus canaria* (Alward et al.,  
73 2018).

74         One sexually dimorphic behavior that is pervasive across animals is imprinting-  
75 like mate preference learning. In imprinting-like mate preference learning, sexually  
76 immature, or juvenile, individuals learn preferences for characteristics of adults (often,  
77 but not always parents) of the opposite sex (Immelmann, 1975; ten Cate and Vos, 1999;  
78 Verzijden et al., 2012). This behavior is inherently sexually dimorphic, as females learn  
79 preferences for male traits, and males learn preferences for female traits (Kendrick et al.,  
80 2001; ten Cate, 1985; Verzijden et al., 2008; Witte and Sawka, 2003). The sexual  
81 dimorphism in trait learning can be quite extreme if adults are highly sexually dimorphic  
82 or there are sex-specific signal modalities, such as male-limited pheromones or song.

83         To better understand the gene networks underlying sexual dimorphism in  
84 imprinting-like learning, we examined sex-specific gene expression patterns in the brains  
85 and eyes of *Bicyclus anynana* butterflies during an imprinting-like learning event. Both  
86 male and female *B. anynana* butterflies exhibit imprinting-like learning, but they learn  
87 preferences for different traits. Female *B. anynana* learn preferences for numbers of  
88 dorsal forewing eyespots and are better at learning preferences for increasing numbers of

89 spots (Westerman et al., 2012). Conversely, male *B. anynana* learn preferences for dorsal  
90 hindwing eyespots and are better at learning preferences for loss of spots (Westerman et  
91 al., 2014). In addition to the observed sexual dimorphism in traits learned and  
92 directionality of learning bias, females learn from males who exude a volatile sex  
93 pheromone (Nieberding et al., 2008; Nieberding et al., 2012; Westerman and Monteiro,  
94 2013), while males learn from females who, to our knowledge, do not have a volatile sex  
95 pheromone. Thus, the two sexes are likely using different cues as unconditioned stimuli  
96 to induce imprinting-like learning.

97         This sexual dimorphism in learning could be associated with sexual dimorphism  
98 in perception, sexual dimorphism in downstream neural processing, or a combination of  
99 these two processes. Previous studies suggest that male *B. anynana* have larger eyes and  
100 more facets (ommatidia) than female *B. anynana*, and consequently, they potentially have  
101 greater spatial acuity (Everett et al., 2012; Macias-Muñoz et al., 2015). If the observed  
102 sexual dimorphism in learning is primarily associated with sexual dimorphism in visual  
103 perception, we expect to see differential gene expression in the eyes of female and male  
104 butterflies and in visual processing genes in the brain. Alternatively, the observed sexual  
105 dimorphism in learning could be associated with sex-specific downstream processing, as  
106 is seen in *D. melanogaster*'s response to pheromones (Datta et al., 2008; Ruta et al.,  
107 2010). In this case we expect to find differential expression of genes unrelated to visual  
108 processing in the brains of males and females. We might also find differential expression  
109 of putative “magic genes,” genes subject to divergent selection that also pleiotropically  
110 affect reproductive isolation, potentially by being associated with both the production of  
111 and preference for given a trait (Servedio et al., 2011), such as butterfly wing patterning

112 genes. Many wing patterning genes are expressed in the heads of *B. anynana* (Ernst and  
113 Westerman, 2021), and males and females have different wing patterns, with males  
114 having brighter UV-reflective eyespots than females (Everett et al., 2012; Prudic et al.,  
115 2011) while females have more dorsal hindwing spots than males (Westerman et al.,  
116 2014). Additionally, since males but not females produce pheromones that can act as the  
117 unconditioned stimuli for learning (Nieberding et al., 2008; Westerman and Monteiro,  
118 2013), we may identify female-specific expression of genes in chemosensory processing  
119 pathways.

120

## 121 **Results**

122 To examine sex-specific gene expression in the brains and eyes of *Bicyclus*  
123 *anynana* butterflies during an imprinting-like learning event, both male and female *B.*  
124 *anynana* butterflies were either subjected to an imprinting-like learning event with a  
125 conspecific of the opposite sex bearing modified wing ornaments or were placed in a  
126 cage alone as a control (Fig. 1A). These two treatments mirror the experiences of trained  
127 and naïve individuals prior to mate choice assays in published butterfly imprinting-like  
128 learning studies (Westerman et al., 2012; Westerman and Monteiro, 2013; Westerman et  
129 al., 2014). Butterflies were observed during these training/control periods, and the  
130 corresponding behavioral data were analyzed to confirm that sex-specific expression  
131 patterns were not the result of sexually dimorphic activity levels (S1 Table & S2 Table).  
132 We then sequenced the eye and brain transcriptomes of these animals, N=10 per  
133 treatment per sex, which generated a total of nearly three billion high-quality 50 base pair  
134 (bp) single end (SE) reads (S3 Table). Approximately 1.6 million reads (0.05% of raw

135 reads) were removed during adapter trimming, with 2.7 billion of the remaining reads  
136 (90% of trimmed reads) mapping to the *B. anynana* reference genome (Nowell et al.,  
137 2017). Across all brain libraries, 16,785 genes (74% of annotated genes in the genome)  
138 had at least 10 mapped reads, while this was the case for 16,612 genes (73%) for eye  
139 libraries. For each tissue, these gene sets were used as input for differential expression  
140 analyses.

141 During data quality assessment, gene expression clustering analysis revealed that  
142 one sample (TMB\_E2, a trained male brain sample) was likely mislabeled, as it clustered  
143 with eye samples (S1 Fig.). Because the two tissue types exhibited distinct clustering  
144 patterns and tissue type accounted for approximately 85% of the variance, this sample  
145 was discarded and not included in downstream analyses.

146 For all differential gene expression comparisons, we used DESeq2 to perform  
147 both a standard differential expression analysis as well as a permutation-test-based  
148 analysis, a method that eliminates the assumption of gene independence and provides a  
149 more accurate representation of the data structure of gene expression datasets (Bloch et  
150 al., 2018; Ghalambor et al., 2015; Slonim, 2002). Nearly all genes that were determined  
151 to be differentially expressed in the standard DESeq2 analyses (Tables S4-S15) were also  
152 identified as differentially expressed when employing permutation test analyses (Tables  
153 S4-S15). Moreover, because the permutation test analyses reduce potential over-  
154 correction by multiple testing correction methods, a larger number of differentially  
155 expressed genes (DEGs) was found for all comparisons. Therefore, all downstream  
156 analyses were conducted with the results of the permutation-based differential expression  
157 tests. While all DEG sets obtained from these analyses were tested for gene ontology

158 (GO) term enrichment, GO term enrichment results are only reported for DEG sets with  
 159 significantly enriched GO terms.

160

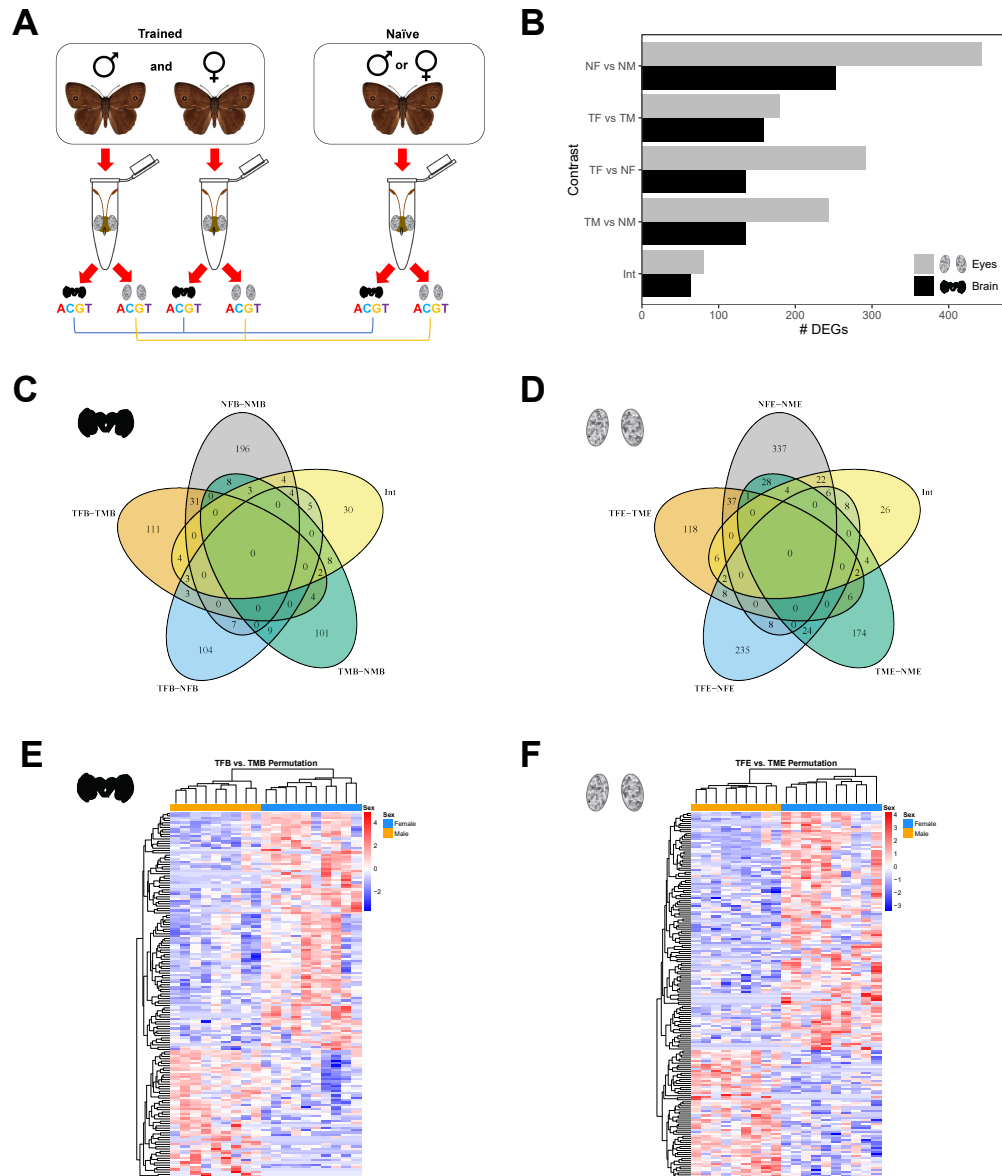

161

162

163

164 **Figure 1: Experimental design and broadscale sexually dimorphic gene expression. A)**

165 Protocol for butterfly training and sampling. Newly emerged males/females were either solo or

166 paired with a two-day-old, zero-spot female/four-spot male. Heads of each focal animal were

167 collected, the brain and eyes dissected, and mRNA sequenced for expression analysis. B)

168 Numbers of differentially expressed genes for each comparison for each tissue. C) Brain Venn



169 diagrams showing overlap patterns for differentially expressed genes. D) Eye Venn diagrams  
170 showing overlap patterns for differentially expressed genes. E) Brain gene expression heatmaps  
171 of differentially expressed genes from trained females vs. trained males. Each row indicates a  
172 single gene, and each column indicates an individual sample. Counts were first normalized by  
173 variance stabilizing transformation, and gene-wise Z-scores were calculated for plotting. Genes  
174 and samples are clustered by expression, with warmer colors denoting increased expression  
175 relative to the mean for a given gene, while cooler colors denote decreased expression relative to  
176 the mean. F) Eye gene expression heatmaps of differentially expressed genes from trained  
177 females vs. trained males. NFB=naïve female brain, NMB=naïve male brain, TFB=trained female  
178 brain, TMB=trained male brain, NFE=naïve female eye, NME=naïve male eye, TFE=trained  
179 female eye, TME=trained male eye, Int=interaction.

180

181

### 182 *Trained male and female brains have distinct expression patterns*

183         Contrasting naïve female and male brains revealed a baseline of 253 genes that  
184 were differentially expressed (Fig. 1B,C; S4 Table). Conversely, 158 genes were found to  
185 be differentially expressed between trained female and male brains (Fig. 1B,C,E; S5  
186 Table). Of these gene sets, 127 genes were unique to the training contrast (Fig. 1C),  
187 several of which are linked to various neural processes, including neurodevelopment,  
188 neural signaling, eye development, and phototransduction (Fig. 2; S16 Table).  
189 Additionally, four genes with putative chemosensory functions were differentially  
190 expressed, all of which were upregulated in females relative to males (chemosensory  
191 protein 6, *BANY.1.2.g12995*; ejaculatory bulb-specific protein 3-like, *BANY.1.2.g12992*;  
192 ejaculatory bulb-specific protein 3-like, *BANY.1.2.g12993*; and odorant receptor Or2-like,  
193 *BANY.1.2.g25738*) (Ernst and Westerman, 2021). Finally, a gene encoding vitellogenin-  
194 like (*BANY.1.2.g11921*), a protein known to influence the social behavior of numerous  
195 insect species (Morandin et al., 2019; Nelson et al., 2007; Roy-Zokan et al., 2015), was  
196 also upregulated in females.

197

198

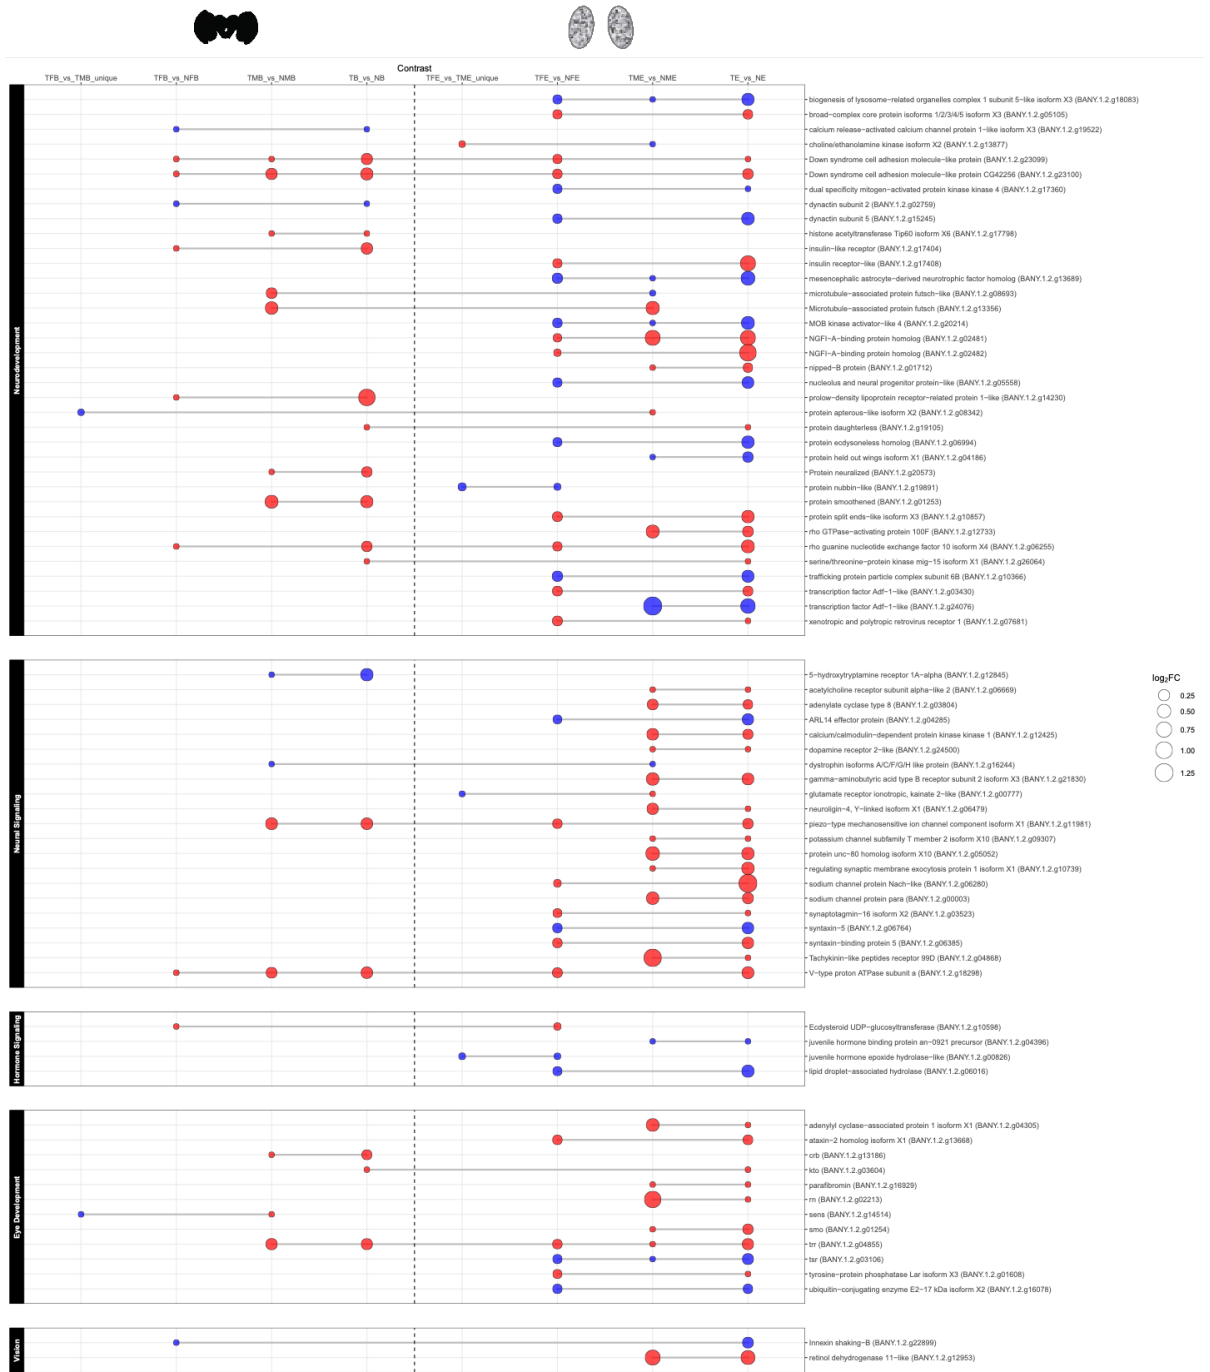

199

200

201

202

203

204

205

206

207 **Figure 2: Neural processing, hormone signaling, and vision genes are differentially**  
208 **expressed in multiple contrasts.** The size of each dot indicates the effect size ( $\log_2FC$ ), while  
209 the color indicates the gene regulation relative to the first sample type listed for the contrast (e.g.,  
210 for the TB vs. NB contrast, red indicates upregulation in trained brains, and blue indicates  
211 downregulation in trained brains). Gray lines connecting the dots denote that the gene was  
212 differentially expressed across multiple contrasts. NFB=naïve female brain, NMB=naïve male  
213 brain, TFB=trained female brain, TMB=trained male brain, NFE=naïve female eye, NME=naïve  
214 male eye, TFE=trained female eye, TME=trained male eye, TB=trained brain, TE=trained eye,  
215 NB=naïve brain, NE=naïve eye.  
216

217 GOExpress analyses, which find gene ontology (GO) terms that best classify  
218 samples from two separate groups, identified 171 GO terms that were significantly  
219 associated with differences between naïve female and male brains ( $p < 0.05$ ; S17 Table),  
220 while 166 GO terms differentiated trained female and male brains ( $p < 0.05$ ; S18 Table).  
221 To eliminate baseline differences, we removed significant terms that were also found in  
222 the naïve results, resulting in 51 GO terms linked to differences specific to training (S18  
223 Table). Of these terms, several are linked to neural processing, including calmodulin  
224 binding ( $p = 0.004$ ), vesicle docking involved in exocytosis ( $p = 0.042$ ), gap junction ( $p =$   
225  $0.046$ ), and neuropeptide signaling pathway ( $p = 0.008$ ).

226

227 *Trained male and female eyes have distinct expression patterns*

228 Differential expression analysis for naïve female and male eyes found a baseline  
229 of 443 genes that were differentially expressed between naïve female and male eyes (Fig.  
230 1B,D; S6 Table). By contrast, 180 DEGs were found for the trained female vs. male  
231 comparison (Fig. 1B,D,F; S7 Table). In total, 142 genes were unique to the trained eye  
232 contrast (Fig. 1D), including genes encoding proteins linked to neurodevelopment, neural  
233 signaling, hormone signaling, and vision (Fig. 2; S16 Table). Moreover, three genes  
234 putatively linked to circadian rhythms showed differential expression, including circadian

235 clock-controlled protein-like (*BANY.1.2.g04378*), which was upregulated in males, and  
236 circadian clock-controlled protein-like (*BANY.1.2.g05915*) and protein takeout-like  
237 (*BANY.1.2.g05914*), which were both upregulated in females. The takeout gene (*to*) is  
238 also associated with male courtship behavior in *D. melanogaster* (Dauwalder et al.,  
239 2002).

240 GOExpress analyses revealed 165 and 138 GO terms that were significantly  
241 linked to expression differences between the sexes for naïve and trained eyes,  
242 respectively ( $p < 0.05$ ; S19, S20 Tables). Removal of terms that overlapped both the  
243 naïve and trained sets resulted in 37 GO terms linked to sex-specific differences in  
244 response to training (S20 Table). A number of these terms were associated with neural  
245 processes and sensory transduction, including chloride transmembrane transport ( $p =$   
246  $0.007$ ), chloride channel activity ( $p = 0.01$ ), vesicle docking involved in exocytosis ( $p =$   
247  $0.017$ ), and G protein-coupled peptide receptor activity ( $p = 0.025$ ).

248

249 *Training has sex-dependent effects on expression patterns in brains and eyes*

250 Sex-specific pairwise comparisons between trained and naïve tissues revealed  
251 many DEGs in all sex-dependent comparisons.

252 Starting with the female comparisons, a total of 135 genes were found to be  
253 differentially expressed between trained and naïve female brains (Fig. 1B,C; S8 Table),  
254 many of which have potential roles in neural development, neural signaling, hormone  
255 metabolism, and eye-related processes (Fig. 2; S16 Table).

256 For the trained vs. naïve female eyes comparison, differential expression analysis  
257 identified 291 DEGs (Fig. 1B,D; S9 Table). GO enrichment analysis found 12 GO terms

258 enriched in this gene set, with the top being mitochondrion (FDR=4.04E-04),  
259 intracellular organelle (FDR=4.04E-04), and organelle (FDR=5.23E-04) (S21 Table).  
260 There were several genes of interest in the trained vs. naïve female eye contrast,  
261 including genes linked to neural development and signaling, hormone signaling, eye  
262 development, and vision (Fig. 2; S16 Table).

263         Similar to the female brains comparison, the trained vs. naïve male brains  
264 comparison found 135 DEGs (Fig. 1B,C; S10 Table), including several genes associated  
265 with neurodevelopment, neural signaling, and eye development (Fig. 2; S16 Table).

266         Differential expression analysis revealed 243 DEGs for the trained vs. naïve male  
267 eyes comparison (Fig. 1B,D; S11 Table). Again, numerous genes involved with neural  
268 development, neural signaling, hormone signaling, vision, and eye development were  
269 found to be differentially expressed between trained and naïve male eyes (Fig. 2; S16  
270 Table).

271         Moreover, 63 genes in the brain and 80 genes in the eye were found to have a  
272 significant sex:condition interaction, indicating that training differentially affected their  
273 expression in females versus males (Fig. 1B,C,D; S12, S13 Tables). In both tissues, these  
274 sex:condition interactions were found for genes involved with neural development and  
275 signaling, and interactions were also found for genes linked to eye development in the  
276 eye comparison (S16 Table). In addition, a gene putatively involved with chemoreception  
277 (olfactory receptor 21, *BANY.1.2.g12009*; (Ernst and Westerman, 2021)) and a gene  
278 associated with regulating circadian rhythms (protein LSM12 homolog,  
279 *BANY.1.2.g13734*; (Lee et al., 2017)) showed significant sex:condition interactions in the  
280 brain and eyes, respectively.

281

282 *Training has a sex-independent effect on gene expression in brains*

283       Testing for the overall effect of training while controlling for differences in  
284 expression due to sex revealed 283 genes that were differentially expressed in trained vs.  
285 naïve brains (Fig. S2A; S14 Table). Many of the genes in this gene set have functions  
286 related to neurodevelopment, neural signaling, hormone signaling, and eye development  
287 (Fig. 2; S16 Table). Moreover, LSM12 homolog (*BANY.1.2.g13734*), which showed  
288 significant sex:condition interactions in the eyes, was also differentially expressed and  
289 was upregulated in naïve brains.

290

291 *Training has a sex-independent effect on gene expression in eyes*

292       In total, 658 DEGs were identified for the trained vs. naïve eyes comparison when  
293 controlling for sex (Fig. S2B; S15 Table). GO enrichment analysis revealed 30 enriched  
294 GO terms, with the top terms being mitochondrion (FDR=1.92E-06), protein-containing  
295 complex (FDR=3.03E-06), and intracellular organelle (FDR=5.17E-06) (S22 Table).

296       Several of these DEGs have putative functions in neurodevelopment, neural  
297 signaling, hormone signaling, eye development, and vision (Fig. 2; S16 Table). In  
298 addition, a number of genes linked to learning and memory were differentially expressed  
299 between trained and naïve eyes. Several of these genes were upregulated in trained eyes,  
300 including nipped-B protein (*BANY.1.2.g01712*), Ca(2+)/calmodulin-responsive adenylate  
301 cyclase (*BANY.1.2.g01825*), two transcription factor Adf-1-like (*BANY.1.2.g03430* and  
302 *BANY.1.2.g08959*), adenylate cyclase type 8 (*BANY.1.2.g03804*), neurobeachin-like  
303 (*BANY.1.2.g12252* and *BANY.1.2.g12258*), and ataxin-2 homolog isoform X1

304 (*BANY.1.2.g13668*). Conversely, cyclic AMP response element-binding protein B  
305 isoform X3 (*BANY.1.2.g01685*), one transcription factor Adf-1-like (*BANY.1.2.g24076*),  
306 probable RNA helicase armi isoform X1 (*BANY.1.2.g17424*), and fatty acid-binding  
307 protein-like (*BANY.1.2.g17524*) were upregulated in naïve eyes. Finally, two genes  
308 involved with male courtship in *Drosophila* (calcium/calmodulin-dependent 3',5'-cyclic  
309 nucleotide phosphodiesterase 1 isoform X1, *BANY.1.2.g07806*; and cytoplasmic dynein 2  
310 heavy chain 1, *BANY.1.2.g19627*) were upregulated in *B. anynana* eyes in the training  
311 condition.

312

313 *One gene network is associated with training condition in the brain*

314 To investigate gene networks that are associated with an imprinting-like learning  
315 experience, we performed tissue-specific weighted gene co-expression network analyses  
316 (WGCNA). Brain co-expression network analysis identified 17 modules, which was  
317 reduced to 11 modules after merging highly correlated modules (Fig. 3A; S3A Fig.). Of  
318 these modules, only one (the red module) was significantly correlated with a trait,  
319 specifically the trained male brain vs. naïve male brain contrast (i.e., the red module was  
320 significantly correlated with training condition for male brains;  $r=0.6$ ;  $FDR=0.004$ ) (Fig.  
321 3C; S3B Fig.). This module consisted of 655 genes (S23 Table), with the top hub gene  
322 (i.e., the most highly connected gene) identified as NADH dehydrogenase [ubiquinone] 1  
323 beta subcomplex subunit 7-like (*BANY.1.2.g00209*). GO enrichment analyses found five  
324 significantly enriched GO terms in the red module, which were linked to nucleic acid and  
325 cyclic compound binding and mRNA metabolism (S24 Table; Fig. 4A).

326

327

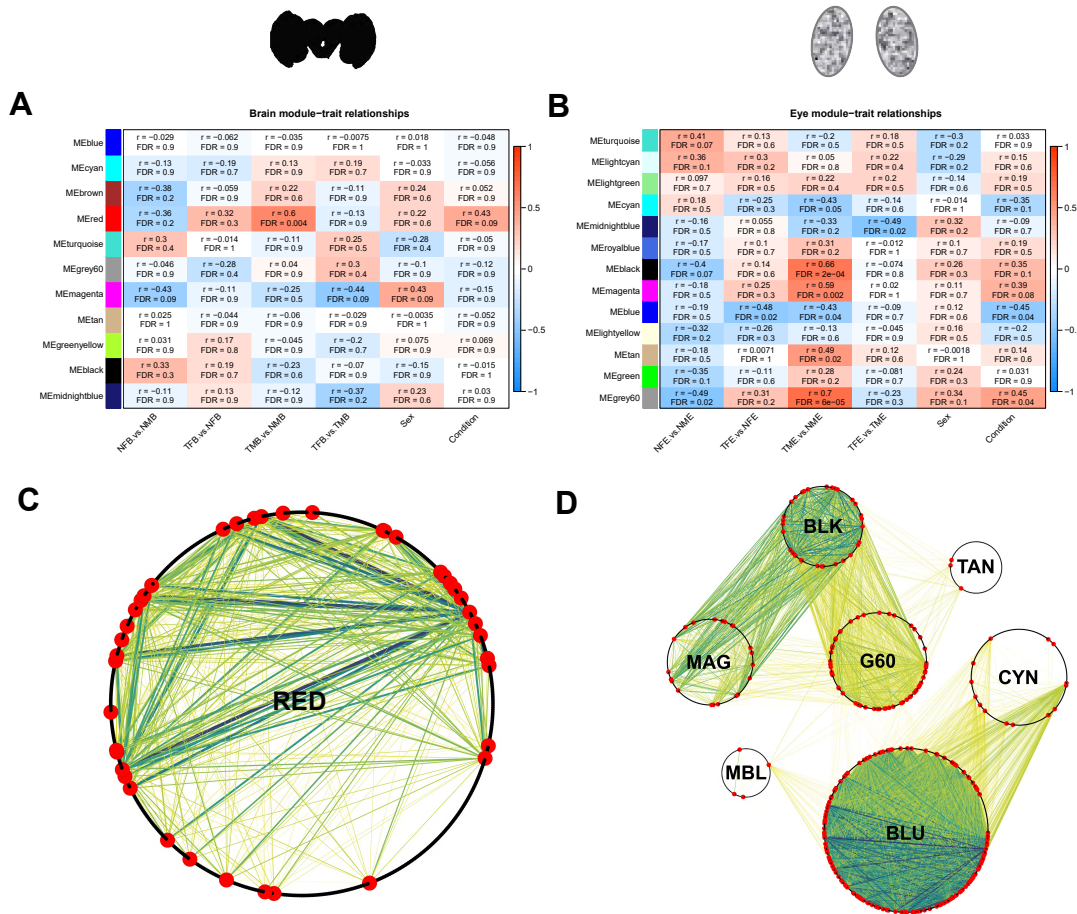

328

329

330

331 **Figure 3: Gene network modules in brain and eyes are significantly associated with**

332 **training.** Significant modules from co-expression analyses. A) Brain module-trait association

333 heatmap. Rows indicate module eigengenes (ME), and columns indicate the pairwise binary

334 indicators representing the various comparisons (“traits”) of interest. The top numbers in each cell

335 denote the correlation value ( $r$ ), with false discovery rate (FDR) values below. Cells are colored

336 by the strength of the association, with  $r$  ranging from -1 to 1. B) Eye module-trait association

337 heatmap. C) WGCNA brain analysis red module Cytoscape plot. Each black dot around the

338 perimeter of the circle indicates a node (gene), with larger red dots indicating differentially

339 expressed genes from the contrast for which the module is significantly associated (i.e., trained

340 vs. naïve male brain). Each line indicates an edge (connection) for differentially expressed genes

341 within the module, with thinner yellow lines indicating weaker connections and thicker blue lines

342 indicating stronger connections. D) WGCNA eye analysis, Cytoscape plot of all significant

343 modules. Only edges for differentially expressed genes within and between modules are shown.

344 BLK=black module, BLU=blue module, CYN=cyan module, G60=grey60 module,

345 MAG=magenta module, MBL=midnightblue module, RED=red module, and TAN=tan module.

346

347

348



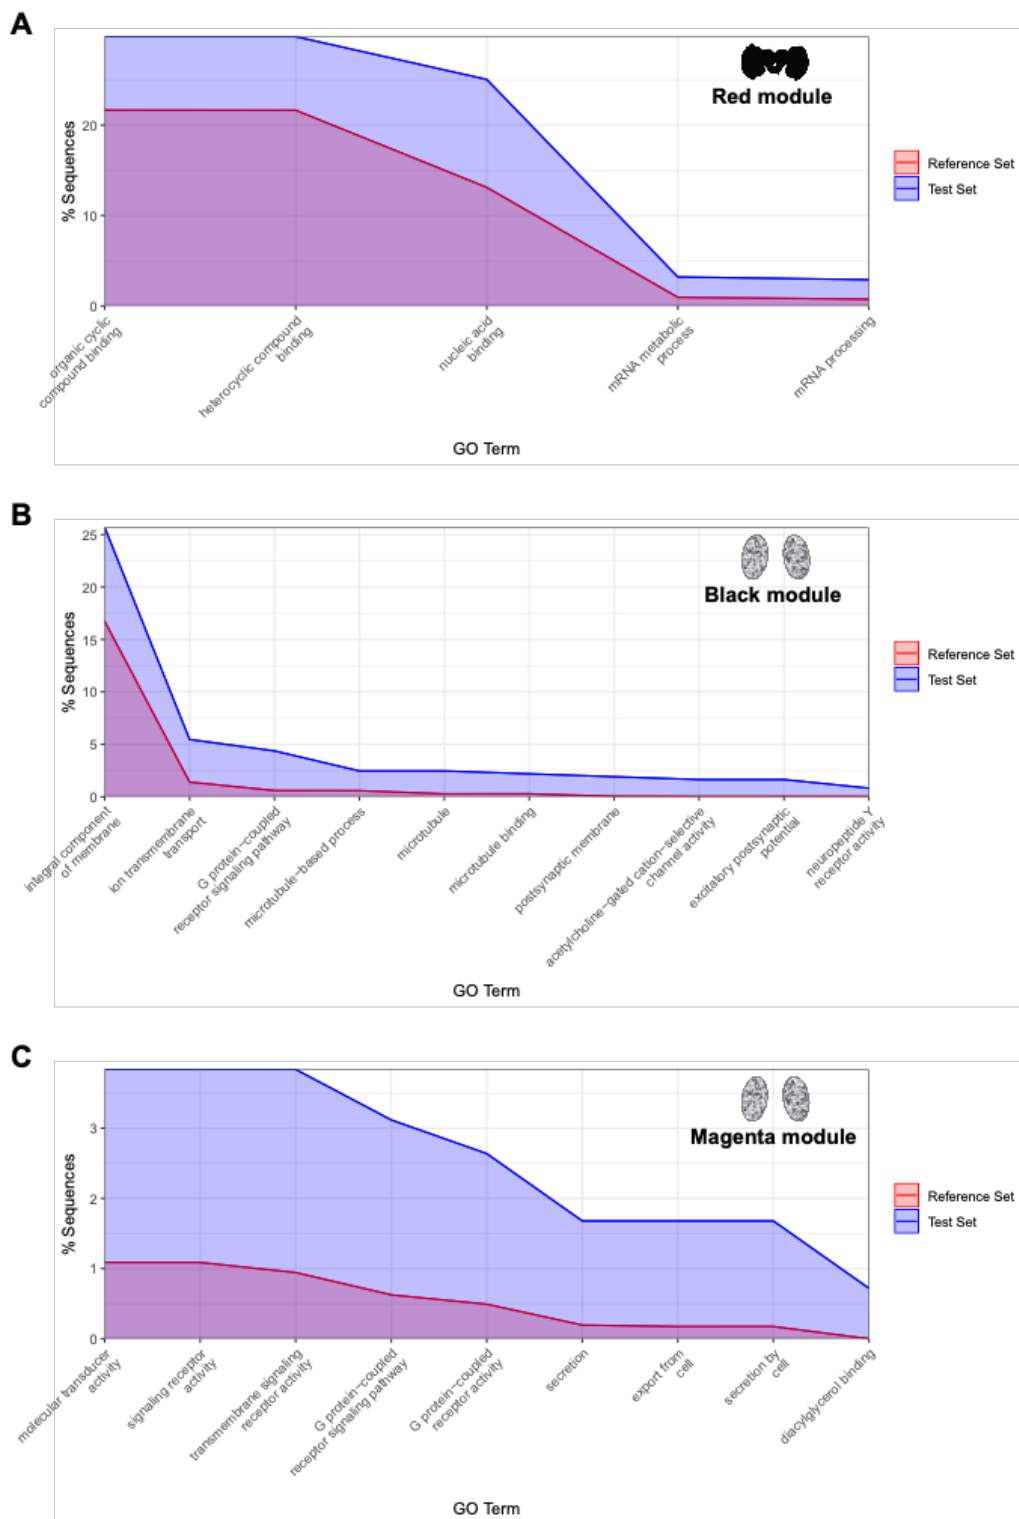

349

350

351 **Figure 4: Gene ontology enrichment plots for significant brain and eye modules of interest.**

352 A) Significantly enriched GO terms in the brain red module. For each GO term, the percentage of

353 sequences annotated with that term within the Test Set (i.e., all red module genes) is plotted along

354 with the percentage of sequences annotated with that term within the Reference Set (i.e., all genes  
355 used in the co-expression analysis). B) Significantly enriched GO terms in the eye black module.  
356 Due to the large number of enriched GO terms in this module, only the most specific terms  
357 identified by Blast2GO were plotted for clarity. C) Significantly enriched GO terms in the eye  
358 magenta module.

359

360 Many genes within the red module are linked to various neural and sensory  
361 processes. Of particular interest, 41 DEGs identified in the trained vs. naïve male brain  
362 contrast were also present in the red module network (S23 Table). Many of these genes  
363 encode proteins linked to neural development, such as protein smoothened  
364 (*BANY.1.2.g01253*), protein abrupt-like isoform X5 (*BANY.1.2.g17381*), histone  
365 acetyltransferase Tip60 isoform X6 (*BANY.1.2.g17798*), Down syndrome cell adhesion  
366 molecule-like protein (*BANY.1.2.g23099*), Down syndrome cell adhesion molecule-like  
367 protein CG42256 (*BANY.1.2.g23100*), and helicase domino (*BANY.1.2.g24509*).  
368 Additionally, others encode proteins involved with neural signaling, such as piezo-type  
369 mechanosensitive ion channel component isoform X1 (*BANY.1.2.g11981*) and V-type  
370 proton ATPase subunit a (*BANY.1.2.g18298*) and eye development, such as *trr*,  
371 (*BANY.1.2.g04855*) and *crb* (*BANY.1.2.g13186*) (S16 Table). In addition to its role in eye  
372 development, *trr* is also involved with short term courtship memory in *D. melanogaster*  
373 (Sedkov et al., 2003).

374

375 *Several gene networks are associated with training condition in the eyes*

376 Eye co-expression network analysis identified 20 modules, which was reduced to  
377 13 modules after merging highly correlated modules (Fig. 3B, S4A Fig.). Of these  
378 modules, seven (the black, blue, cyan, grey60, magenta, midnight blue, and tan modules)

379 were significantly correlated with at least one contrast, and DEGs for the correlated  
380 contrast(s) were present in all seven of these modules (Fig. 3D, S4 Fig.; Tables S25-S37).

381       Two of these modules (the black and magenta modules), both of which were  
382 significantly correlated with the trained male vs. naïve male eyes contrast, were of  
383 particular interest based on their GO enrichment profiles. The black module ( $r=0.66$ ;  
384  $FDR=2E-04$ ) consisted of 366 genes centered around the top hub gene gamma-  
385 aminobutyric acid type B receptor subunit 2 (*BANY.1.2.g00039*), a component of the  
386 receptor for the neurotransmitter GABA (S27 Table; Fig. 3D, S4C Fig.). Moreover, 73  
387 GO terms were enriched in this module, most of which are associated with neural  
388 processes (e.g., neurotransmitter receptor activity involved in regulation of postsynaptic  
389 membrane potential, chemical synaptic transmission, and excitatory postsynaptic  
390 potential) (S28 Table; Fig. 4B). A total of 32 DEGs from the trained male vs. naïve male  
391 eyes contrast were found in the black module, nearly half of which are associated with  
392 neural and eye development and neural signaling. Differentially expressed development  
393 genes include protein unc-80 homolog isoform X10 (*BANY.1.2.g05052*), microtubule-  
394 associated protein futsch-like (*BANY.1.2.g08693*), delta and Notch-like epidermal growth  
395 factor-related receptor (*BANY.1.2.g09881*), protein abrupt-like isoform X1  
396 (*BANY.1.2.g17383*), and *rst* (*BANY.1.2.g15359*) (S16 Table; S27 Table). Moreover,  
397 differentially expressed neural signaling genes include sodium channel protein para  
398 (*BANY.1.2.g00003*), potassium voltage-gated channel subfamily KQT member 1 isoform  
399 X2 (*BANY.1.2.g01557*), adenylate cyclase type 8 (*BANY.1.2.g03804*), neuroligin-4, Y-  
400 linked isoform X1 (*BANY.1.2.g06479*), acetylcholine receptor subunit alpha-like 2  
401 (*BANY.1.2.g06669*), potassium channel subfamily T member 2 isoform X10

402 (*BANY.1.2.g09307*), calcium/calmodulin-dependent protein kinase kinase 1  
403 (*BANY.1.2.g12425*), sodium leak channel non-selective protein (*BANY.1.2.g19402*),  
404 gamma-aminobutyric acid type B receptor subunit 2 isoform X3 (*BANY.1.2.g21830*), and  
405 dopamine receptor 2-like, (*BANY.1.2.g24500*) (S16 Table; S27 Table).

406       The magenta module ( $r=0.59$ ;  $FDR=0.002$ ) consisted of 417 genes with a hub  
407 gene of disintegrin and metalloproteinase domain-containing protein 33-like (S29 Table;  
408 S4D Fig.) and showed an enriched GO term profile similar to that of the black module  
409 (S30 Table; Fig 4C). Specifically, the terms transmembrane signaling receptor activity, G  
410 protein-coupled receptor signaling pathway, G protein-coupled receptor activity,  
411 signaling receptor activity, and molecular transducer activity were found to be enriched  
412 in both the black and magenta modules. In total, 21 DEGs from the trained male vs. naïve  
413 male eyes contrast were found in the magenta module, a third of which have putative  
414 functions in neurodevelopment (protein smoothed isoform X2, *BANY.1.2.g01254*;  
415 putative defective proboscis extension response, *BANY.1.2.g12002*; rho GTPase-  
416 activating protein 100F, *BANY.1.2.g12733*; and dynamin-like 120 kDa protein,  
417 mitochondrial, *BANY.1.2.g23042*), neural signaling (regulating synaptic membrane  
418 exocytosis protein 1 isoform X1, *BANY.1.2.g10739*; and dopamine receptor 1,  
419 *BANY.1.2.g24271*), and eye development (adenylyl cyclase-associated protein 1 isoform  
420 X1, *BANY.1.2.g04305*) (S16, S29 Tables).

421

422 *Wing patterning genes are differentially expressed in both the brain and eyes*

423       To investigate whether putative “magic genes,” or genes that influence both a  
424 given trait as well as preference for that trait, are expressed in the brain and eyes of *B.*

425 *anymana*, we also explored the expression patterns of known butterfly wing patterning  
426 genes. A total of 53 wing patterning genes were found to be expressed in the brain, while  
427 50 were expressed in the eyes (S38 Table). Although none of these wing patterning genes  
428 exhibited sex-specific expression (meaning only expressed in one sex) in either tissue, 46  
429 were in common across the two tissues. Seven genes showed brain-specific expression,  
430 including homologs for cortex (*BANY.1.2.g04256*), engrailed (*BANY.1.2.g14935*), CD63-  
431 antigen (*BANY.1.2.g12556*), aristaless (*BANY.1.2.g21346* and *BANY.1.2.g24453*), and  
432 BarH-1 (*BANY.1.2.g19326* and *BANY.1.2.g22154*), while four exhibited eye-specific  
433 expression, including homologs for hedgehog (*BANY.1.2.g04016*) and CD63-antigen  
434 (*BANY.1.2.g20540*, *BANY.1.2.g25497*, and *BANY.1.2.g25594*).

435         Several wing patterning genes were identified as differentially expressed for  
436 various contrasts, including between and within sexes, in both tissue types. For the naïve  
437 female vs. male brain contrast, sal-like protein 1 (*BANY.1.2.g09547*) and CD63 antigen-  
438 like (*BANY.1.2.g23713*) are both upregulated in females (Fig. 5, Table S4). In the trained  
439 female vs. male brain contrast protein apterous-like isoform X2 (*BANY.1.2.g08342*) is  
440 upregulated in males (Fig. 5, S5 Table). In the naïve female vs. male eye contrast CD63  
441 antigen-like (*BANY.1.2.g25497*) is upregulated in females (Fig. 5, S6 Table). Moreover,  
442 in the eye interaction contrast CD63 antigen-like (*BANY.1.2.g25497*) is upregulated in  
443 trained females and naïve males (Fig. 5, S13 Table), and in the trained vs. naïve eye  
444 controlling for sex contrast CD63 antigen-like isoform X2 (*BANY.1.2.g10818*) is  
445 upregulated in naïve eyes (Fig. 5, S15 Table).

446

447

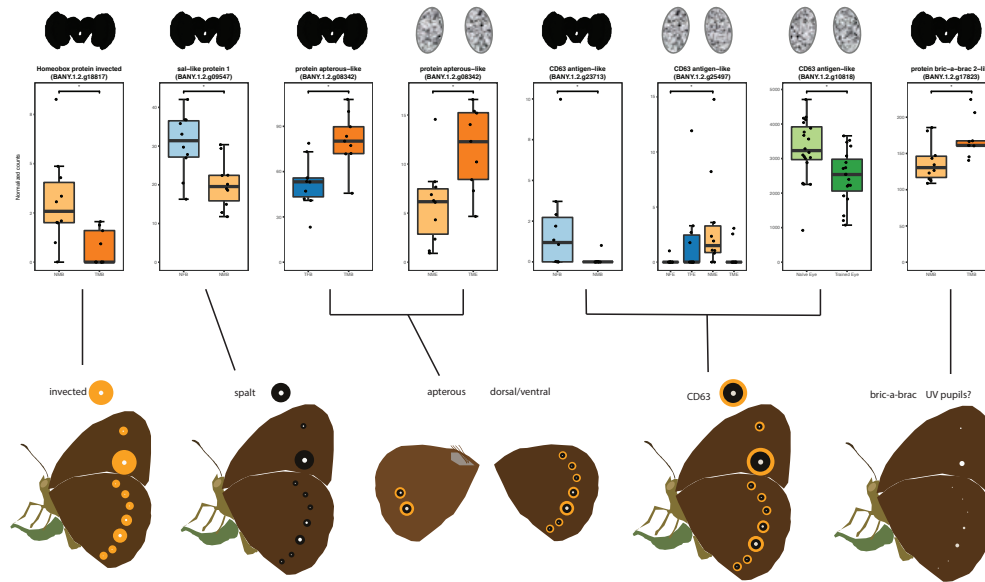

448

449

450 **Figure 5: Genes that influence *B. anynana* wing patterns are also differentially expressed in**  
 451 **the brain and eye during training.** Top panel contains box plots of differentially expressed  
 452 genes in different contrasts. Bottom panel indicates the elements of butterfly wing pattern (gold  
 453 ring, eye spot center, black ring, whole eye spot, or dorsal/ventral identity) influenced by the  
 454 corresponding differentially expressed gene. For top panel, light hue = naïve, dark hue = trained,  
 455 orange = male, blue = female, green = condition (general trained/naïve).

456

457

458

459

460 When comparing within sexes, three known wing patterning genes were  
 461 differentially expressed in male brains or eyes. In the trained vs. naïve male brain  
 462 contrast, protein bric-a-brac 2-like isoform X4 (*BANY.1.2.g17823*) is upregulated in  
 463 trained males while Homeobox protein invected (*BANY.1.2.g18817*) is upregulated in  
 464 naïve males (Fig. 5, S10 Table). By contrast, in the trained vs. naïve male eye comparison  
 465 protein apterous-like isoform X2 (*BANY.1.2.g08342*) is upregulated in trained males (Fig.  
 466 5, S11 Table). No known wing pattern genes were differentially expressed in female-  
 467 specific contrasts.

468

## 469 **Discussion**

470           Here we identified a number of genes that were differentially expressed in the  
471 brains and eyes of females and males during an imprinting-like learning event, as well as  
472 several associated gene networks. We found DEGs in both tissue types, suggesting that  
473 imprinting-like learning, and sexually dimorphic aspects of this learning process, are  
474 associated with transcriptional change in both the peripheral sensory system and the  
475 brain. A number of chemosensory genes were upregulated in females relative to males,  
476 supporting the hypothesized female-specific use of pheromones in the mate preference  
477 learning process (Westerman and Monteiro, 2013; Westerman et al., 2014). Furthermore,  
478 a suite of butterfly wing patterning genes, which have long been hypothesized to also  
479 influence mate preference and potentially serve as “magic genes,” were also differentially  
480 expressed in the eyes and brains of *B. anynana* butterflies during training events, further  
481 supporting their hypothesized role in mate preference and speciation.

482           One of the more interesting aspects of sexually dimorphic imprinting-like learning  
483 in *B. anynana* is the presence/absence of sex pheromones in males versus females.  
484 Previous studies have shown that the male sex pheromone is an indicator of age  
485 (Nieberding et al., 2012), is species-specific (Bacquet et al., 2015; Nieberding et al.,  
486 2008), is equally weighted with visual signals during female mate selection (Costanzo  
487 and Monteiro, 2007), and influences the valence females learn to associate with visual  
488 signals during imprinting-like learning (Westerman and Monteiro, 2013). Thus, male  
489 chemical cues are known to be important for female mate choice in this system. On the  
490 other hand, a sex pheromone has not been discovered in female *B. anynana*, and it

491 remains unclear what unconditioned stimulus males use to assign positive valence to  
492 number of hindwing spots. The results of this study appear to support this sex-specific  
493 use of olfactory signals during the learning process. The most clear-cut finding  
494 supporting this hypothesis is that chemosensory genes are upregulated in females relative  
495 to males during the training period. A second result that may be related to the differential  
496 use of olfactory cues during the learning (and mate choice) process is that we found a  
497 larger set of gene networks associated with the training condition in the brains and eyes  
498 of males than in females. This could be a result of imprinting-like learning being more  
499 consistent in males than females (Westerman et al., 2012; Westerman et al., 2014).  
500 However, it could also be a side effect of females relying more heavily on olfactory  
501 signals than males, as we did not include antennae in our analyses and consequently may  
502 have missed learning-associated gene networks that reside in female antennae. Female  
503 *Heliconius melpomene* and *Heliconius cydno* butterflies are sensitive to male pheromones  
504 (Byers et al., 2020) and exhibit different antennae expression profiles before and after  
505 copulation as well as sex-specific expression profiles (van Schooten et al., 2020). It  
506 would be interesting to see if *B. anynana* females exhibit training-specific, sexually  
507 dimorphic antennae expression profiles that correspond to their sex-specific emphasis on  
508 olfactory signals during the preference learning and mate selection process.

509         While the gene expression patterns of the antennae are unknown for these  
510 animals, we did find training-specific, sexually dimorphic gene expression patterns in *B.*  
511 *anynana* eyes. Because female and male *B. anynana* butterflies learn preferences for  
512 different visual signals and exhibit visual learning biases in different directions (gains and  
513 losses, respectively (Westerman et al., 2012; Westerman et al., 2014)), one of our



514 hypotheses was that we would see sexually dimorphic expression of vision-related genes  
515 during the learning process, especially in the eyes. Although we did not observe  
516 differential expression of any opsins, we did find sex-dependent expression patterns of a  
517 number of vision-related genes, including an ommochrome-binding protein, retinol  
518 dehydrogenase 11, rhodopsin kinase 1 (*Gprk1*), and arrestin homolog isoform X2.  
519 Ommochrome pigments act as filtering pigments in the eyes of butterflies, limiting the  
520 wavelengths of light a butterfly can see (Arikawa and Stavenga, 2014; Stavenga, 2002).  
521 These filtering pigments are sexually dimorphic in a number of different species,  
522 including *H. cydno*, *H. melpomene*, *Heliconius pachinus*, and *Colias erate*, and are  
523 hypothesized to influence mate choice in these systems (Buerkle et al., 2022; Ogawa et  
524 al., 2013). It remains unclear whether filtering pigment type or distribution is sexually  
525 dimorphic in *B. anynana*, or whether filtering pigment production or distribution in the  
526 eye is plastic in response to circadian rhythms, social scenario, or age. However, our  
527 findings of socially-dependent expression patterns of ommochrome-binding protein and a  
528 number of other vision-related genes suggest that vision is highly dynamic, not just in the  
529 context of light environment (Obara et al., 2008; Sakai et al., 2018; Wright et al., 2020)  
530 and circadian rhythms (Li et al., 2008; Li et al., 2005), but also in response to social  
531 environment.

532         In addition to finding vision-associated differentially expressed genes, a number  
533 of learning and memory genes were differentially expressed specifically in the eyes,  
534 including dopamine receptors. Moreover, the most highly connected gene for a gene  
535 network associated with training condition in male eyes (the black module) encodes a  
536 component of the receptor for the neurotransmitter GABA, gamma-aminobutyric acid

537 type B receptor subunit 2. This network also contained a variety of genes involved with  
538 neural processing that were differentially expressed between trained and naïve male eyes,  
539 including additional neurotransmitter receptors (acetylcholine receptor subunit alpha-like  
540 2, gamma-aminobutyric acid type B receptor subunit 2 isoform X3, and dopamine  
541 receptor 2-like). While there is some debate over whether eyes should be considered part  
542 of the peripheral nervous system or the central nervous system in vertebrates (London et  
543 al., 2013), there has been less attention given to the potentially broad cognitive role of the  
544 retina in comparison to the optic lobe in insects (as illustrated by (Perry et al., 2017)).  
545 Our findings not only indicate that transcription in the butterfly eye changes in response  
546 to social scenario (presence/absence of a sexually mature conspecific), but that this  
547 change includes the transcription of genes associated with higher processing, indicating  
548 that neurogenomic processes associated with cognition might not be limited to the optic  
549 lobe and central brain in insects, but might also occur in the retina.

550

### 551 *Broad role of sensory receptors and neurotransmitters in sexually dimorphic behavior*

552         Although neurogenomic assessment of sexually dimorphic behavior is relatively  
553 rare to date, similarities between our results and those in other animal systems suggest  
554 common mechanisms may underlie sexually dimorphic behavior across animal taxa.  
555 Sensory receptors seem to be especially important and connected to downstream sexually  
556 dimorphic gene networks. For example, odorant receptor expression influences female  
557 receptivity and male ability to differentiate between the sexes in *D. melanogaster* (Datta  
558 et al., 2008), male and female zebra finches exhibit different brain gene expression  
559 profiles when listening to the same song (Gobes et al., 2009), a number of butterfly

560 species exhibit sexually dimorphic opsin expression patterns (Buerkle et al., 2022;  
561 Everett et al., 2012), and *B. anynana* exhibit sexually dimorphic chemical receptor  
562 expression during a mate preference learning event (this study). Sexually dimorphic  
563 catecholamine-associated expression (receptors or binding proteins, for example) also  
564 appears to be important for driving sexually dimorphic social behaviors across taxa, as  
565 illustrated by sex-dependent distribution of tyrosine hydroxylase in male and female  
566 plainfin midshipman fish brains (Goebrecht et al., 2014) and sexually dimorphic  
567 association of dopamine receptors and binding proteins with social interactions in *B.*  
568 *anynana* butterflies (this study). Pathways integrating sensory receptors and  
569 catecholamine neurotransmitters may be particularly fruitful for future study of sexually  
570 dimorphic behaviors across animal taxa.

571

572 *Wing patterning genes may be “magic” genes*

573 While butterfly wing patterning genes have long been hypothesized to play a role  
574 in shaping both wing pattern and preference for wing pattern (Kronforst and Papa, 2015;  
575 Kronforst et al., 2006; Merrill et al., 2015; Merrill et al., 2019; Naisbit et al., 2001),  
576 evidence supporting this hypothesis has been rare. Here we show that a number of wing  
577 patterning genes are differentially expressed in the brain and eyes during a sexual  
578 (training) encounter. Not only are these genes associated with wing patterning in a range  
579 of butterfly species, but a subset of these genes are specifically associated with aspects of  
580 eyespot production in *B. anynana* (Brunetti et al., 2001; Ozsu and Monteiro, 2017;  
581 Prakash and Monteiro, 2018) and/or with UV reflectance (Ficarrotta et al., 2022).  
582 Because male and female *B. anynana* learn preferences for eyespot number, and

583 specifically the UV-reflective center of the eyespots (Westerman et al., 2012; Westerman  
584 et al., 2014), these genes that both influence eyespots or UV scale production and are  
585 differentially expressed in the brain or eyes during an intersexual social encounter  
586 (*invected*, *spalt*, *apterous*, *CD63 antigen-like*, and *bric-a-brac*) are particularly promising  
587 candidate magic genes in the *B. anynana* system. The brain and eye expression profiles of  
588 genes known to influence wing patterning traits important for mate selection in other  
589 butterfly systems, such as *BarH-1* (Woronik et al., 2019), *artistaless* (Westerman et al.,  
590 2018), *cortex* (Nadeau et al., 2016), and *doublesex* (Kunte et al., 2014), support the  
591 hypothesis that these genes may be expressed in the brains or eyes of the butterfly species  
592 using these genes to control wing pattern elements under sexual selection. Future studies  
593 should explore the pervasiveness of genes influencing both wing pattern and mate  
594 preference across the Lepidoptera.

595

## 596 **Conclusions**

597 Here we show that sexually dimorphic, imprinting-like learning is associated with  
598 sexually dimorphic gene expression in the brains and eyes of *B. anynana* butterflies  
599 during a training event. Differentially expressed genes include sensory receptors and  
600 genes associated with neurotransmitters in both tissue types, indicating dynamic and sex-  
601 specific responses to social scenario in both the peripheral and central nervous systems.  
602 Sexually dimorphic expression of chemosensory genes supports the role of pheromones  
603 in female but not male imprinting-like learning, while the learning-related expression of  
604 numerous wing patterning genes highlight the potential for these genes to influence both  
605 wing pattern and mate preference. Future research should explore the gene and neural

606 networks bridging sexually dimorphic sensory receptors to sexually dimorphic behavior,  
607 and determine the functional role of wing patterning genes in mate preference in other  
608 lepidopterans.

609

## 610 **Materials and Methods**

### 611 *Study Species and Husbandry*

612 *Bicyclus anynana* is a sub-tropical African butterfly that has been reared in the lab  
613 since 1988. The colony at the University of Arkansas was established in spring 2017  
614 from ~1,000 eggs derived from a population in Singapore. Butterflies at the University of  
615 Arkansas were reared in a climate-controlled greenhouse at ~27°C, 70% humidity, and  
616 under a 13:11h light:dark cycle to mimic wet season conditions and ensure development  
617 of the wet season phenotype (Brakefield and Reistma, 1991). Butterflies bred in the  
618 laboratory have levels of genetic diversity comparable to those in natural populations, as  
619 suggested by similar single-nucleotide polymorphism frequencies found in laboratory and  
620 natural populations (Beldade et al., 2006; de Jong et al., 2013).

621 All adult butterflies used in this study hatched from eggs laid on young corn  
622 plants (*Zea mays*) in breeding colony cages containing ~200-500 male and female *B.*  
623 *anynana* butterflies. Plants with eggs were moved to cages containing additional corn  
624 plants for larval consumption, and larvae were fed *ad libitum* until pupation. Upon  
625 pupation, pupae were placed in mesh cages (31.8 cm × 31.8 cm × 31.8 cm; Bioquip,  
626 Compton, CA, USA) until emergence. Upon emergence, butterflies were transferred to  
627 sex- and age-specific cages to isolate the sexes from one another. All butterflies were  
628 provided with fresh banana every other day.

629

630 *Behavioral assays and sample collection*

631 All behavioral assays and sample collection took place between November 2018 -  
632 July 2019. Within one hour of dawn, assays were conducted by placing butterflies in a  
633 novel mesh cage (39.9 cm × 39.9 cm × 59.9 cm; Bioquip, Compton, CA, USA) for a  
634 three-hour observation period (Fig. 1A). Training behavioral assays consisted of either:  
635 (1) a newly emerged male paired with a two-day-old, zero-spot female, for which black  
636 paint (Enamel Glossy Black 1147, Testors, Rockford, IL, USA) was applied directly on  
637 top of her two dorsal hindwing eyespot pupils to block all UV reflectance (for details see  
638 (Westerman et al., 2014)) or (2) a newly emerged female paired with a two-day-old, four-  
639 spot male, for which UV-reflective paint (White, FishVision, Fargo, ND, USA) was  
640 applied between the two natural dorsal forewing eyespot pupils to create two extra  
641 eyespot pupils (for details see (Westerman et al., 2012)). The UV-reflective paint closely  
642 replicated the reflectance spectra of natural *B. anynana* eyespot pupils (Westerman et al.,  
643 2012). All eyespot manipulations were performed one day prior to behavioral watches.  
644 Control assays consisted of either one newly emerged male or one newly emerged female  
645 placed in a novel mesh cage (39.9 cm × 39.9 cm × 59.9 cm; Bioquip, Compton, CA,  
646 USA) in isolation. For any given training assay, a control assay using the same sex as the  
647 training assay focal animal was conducted concurrently (e.g., for a newly emerged male +  
648 zero-spot female training assay, a control assay consisting of a newly emerged male in  
649 isolation was run in tandem). All behaviors exhibited by the observed butterflies were  
650 recorded using SpectatorGo! (BIOBSERVE; Bonn, Germany). Observed behaviors

651 included: *flutter*, *fly*, *walk*, *rest* (wings closed), *bask* (wings open greater than 45°),  
652 *antenna wiggle*, *court* (as defined in (Nieberding et al., 2008), and *copulate*.

653           After the three-hour behavioral watch, each butterfly's head was removed with  
654 RNase-free scissors, transferred into a RNase-free microcentrifuge tube (Biotix; San  
655 Diego, CA, USA), and immediately flash frozen in liquid nitrogen. Frozen samples were  
656 then stored in a -80°C freezer until dissection and RNA extraction. We collected the  
657 heads of ten individuals per group (trained male, trained female, naïve male, and naïve  
658 female) to account for variation in response to training, as previous studies suggest that  
659 ~75% of females and ~80% of males learn to prefer the trainer phenotype after a three-  
660 hour training exposure (Westerman et al., 2012; Westerman et al., 2014).

661

#### 662 *RNA extraction and cDNA library preparation*

663           To prevent RNA degradation during processing, heads were immersed in 500 µL  
664 of pre-chilled RNAlater-ICE (Ambion; Austin, TX, USA) and incubated at -20°C for  
665 approximately 18 hours prior to dissection. Thawed heads were then dissected under a  
666 dissecting microscope (Zeiss Stemi 508; Jena, Germany) while submerged in RNAlater-  
667 ICE to isolate eye and brain tissue. The eyes and brain for each sample were  
668 mechanically disrupted separately in lysis buffer using RNase-free, disposable pestles,  
669 and small (<200 nucleotides) and large (>200 nucleotides) RNA were extracted  
670 separately for each tissue with the NucleoSpin® miRNA kit (Macherey-Nagel; Düren,  
671 Germany). RNA quality and quantity were determined using a NanoDrop 2000 (Thermo  
672 Fisher Scientific; Waltham, MA, USA), Qubit 2.0 (Invitrogen; Waltham, Massachusetts,  
673 USA), and TapeStation 2200 (Agilent; Santa Clara, CA, USA).

674 Libraries were prepared for the eyes (left and right eye together; n=40) and brain  
675 (n=40) for each individual using the KAPA mRNA HyperPrep Kit and Unique Dual-  
676 Indexed Adapters (KAPA Biosystems; Wilmington, MA, USA), with 100 ng of large  
677 RNA as input. After running all cDNA libraries on a TapeStation 2200 (Agilent; Santa  
678 Clara, CA, USA) and confirming that they were of high quality, libraries were shipped to  
679 the University of Chicago Genomics Facility on dry ice. All libraries were subjected to an  
680 additional quality assessment using a 5300 Fragment Analyzer (Agilent; Santa Clara, CA,  
681 USA), followed by 50 bp SE sequencing across eight lanes of a HiSeq 4000 (Illumina;  
682 San Diego, CA, USA).

683

#### 684 *Read trimming, alignment, and quantification*

685 We concatenated the raw fastq files from all eight lanes for each library and  
686 performed an initial quality assessment using FastQC v0.11.5  
687 (<http://www.bioinformatics.babraham.ac.uk/projects/fastqc/>). One sample (TME\_A3, a  
688 trained eye sample) failed to sequence properly, so was discarded from downstream  
689 analysis. Trimmomatic v0.38 was used to remove any Illumina sequencing adapters from  
690 the raw reads (Bolger et al., 2014). We then aligned the adapter-trimmed reads for each  
691 sample to the most recent *B. anynana* reference genome (v1.2; (Nowell et al., 2017))  
692 using STAR v2.7.1a (Dobin et al., 2013) and quantified all reads using the "--quantMode  
693 GeneCounts" option, which is equivalent to counts produced by the htseq-count script  
694 from HTSeq (Anders et al., 2015).

695

#### 696 *Differential gene expression analyses*



697           The read counts generated by STAR were used as input for the DESeq2 v1.24.0  
698 package (Love et al., 2014) for R (Version 3.6.2, R Foundation for Statistical Computing,  
699 Vienna, Austria) to conduct differential expression analyses. Specifically, we used the  
700 generalized linear model design:

$$701 \quad y \sim \text{sex} + \text{condition} + \text{sex}:\text{condition}$$

702 where expression ( $y$ ) is a function of *sex* (male or female), *condition* (trained or naïve),  
703 and their interaction (*sex:condition*). With this design, we made five different tissue-  
704 specific comparisons: (1) naïve females vs. naïve males; (2) trained females vs. trained  
705 males; (3) trained females vs. naïve females; (4) trained males vs. naïve males; and (5)  
706 the interaction of sex and condition. To investigate the overall effect of training while  
707 controlling for differences in expression specific to sex, we performed an additional  
708 tissue-specific analysis that utilized the design:

$$709 \quad y \sim \text{sex} + \text{condition}$$

710           Only genes with  $\geq 10$  total mapped reads were used for the differential expression  
711 analyses. Gene expression comparisons were conveyed as the binary log of the  
712 expression fold change ( $\log_2\text{FC}$ ), with  $\log_2\text{FC}$  shrinkage performed using the ash method  
713 (Stephens, 2017) to obtain more accurate estimates of effect size. Genes were considered  
714 differentially expressed if they had a false discovery rate (FDR; (Benjamini and  
715 Hochberg, 1995))  $< 0.05$ .

716           In addition to these standard differential expression analyses, we also performed  
717 permutation tests similar to those utilized in Ghalambor et al. (2015) and Bloch et al.  
718 (2018). Because this method does not assume gene independence (an unlikely assumption  
719 given the nature and abundance of gene co-expression networks), the risk of over-

720 correction is reduced compared to other multiple testing correction methods, resulting in  
721 a more accurate representation of the expression data structure (Slonim, 2002). For each  
722 tissue, we randomly assigned both the sex and treatment for each sample to create 1,000  
723 permuted sample phenotype tables. For each of the reassigned sample sets, we ran the  
724 DESeq2 analysis exactly as we had for the original analysis, ultimately resulting in a null  
725 distribution of 1,000 p-values for every gene. For any given gene, if the p-value from the  
726 original analysis was less than the 1% tail of the permuted null distribution, it was  
727 considered differentially expressed. Annotations for all differentially expressed genes,  
728 including the identified putative vision- and chemosensory-related gene annotations, were  
729 extracted from the *B. anynana* reference genome functional annotation from (Ernst and  
730 Westerman, 2021).

731

### 732 *Weighted gene co-expression network analyses*

733 We performed separate weighted gene co-expression network analyses  
734 (WGCNA) for the brain and eyes using the WGCNA v1.70-3 R package (Langfelder and  
735 Horvath, 2008) following the WGCNA package developers' recommendations. We first  
736 preprocessed the expression data by removing all genes with <10 reads in >90% of the  
737 samples to minimize noise from lowly-expressed genes, and a variance-stabilizing  
738 transformation was performed on the remaining data using the  
739 “varianceStabilizingTransformation” function in DESeq2. Signed co-expression  
740 networks for each tissue were constructed by building an adjacency matrix with type =  
741 “signed,” topological overlap matrix (TOM) with TOMType = “signed,” and the soft-  
742 thresholding power set to 12 for brains and 14 for eyes. We then identified modules of

743 co-expressed genes using the “cutreeDynamic” function with the following parameters:  
744 deepSplit = 2, pamRespectsDendro = FALSE, and minClusterSize = 30. After initial  
745 module identification, we merged modules of high co-expression similarity by first  
746 calculating and clustering their eigengenes (the first principal component of a module  
747 representing its gene expression profile (Langfelder and Horvath, 2008)) and employing  
748 the “mergeCloseModules” function with the “cutHeight” set to 0.25.

749 To identify modules that were significantly associated with any of the sample  
750 traits, we used the “binarizeCategoricalVariable” function to create pairwise binary  
751 indicators (“traits”) for our contrasts of interest (i.e., naïve male vs. naïve female, trained  
752 female vs. naïve female, trained male vs. naïve male, and trained female vs. naïve  
753 female) and correlated eigengenes with these sample traits. We then adjusted all p-values  
754 using the FDR method (Benjamini and Hochberg, 1995), and any module-trait  
755 correlations with an FDR <0.05 were considered significant. For all modules that showed  
756 significant associations with sample traits, hub genes (genes with the highest  
757 connectivity) were identified using the “chooseTopHubInEachModule” function.

758 For visualization and further analysis, both networks were then exported to  
759 Cytoscape v3.8.2 (Shannon et al., 2003) using the “exportNetworkToCytoscape” function  
760 with “threshold” set to 0.02. The Cytoscape “Network Analyzer” tool was used to obtain  
761 further statistics regarding the connectivity of genes within the network. Specifically, we  
762 calculated three statistics for each gene: (1) degree (the number of other genes connected  
763 to a given gene, with a larger number indicating a more highly connected gene), (2)  
764 neighborhood connectivity (the average connectivity of all of a gene’s neighboring  
765 genes), and (3) clustering coefficient (how connected a gene is to its neighboring genes

766 relative to how connected it could be, with “0” representing completely unconnected and  
767 “1” representing maximum connectivity).

768

### 769 *Gene Ontology Analyses*

770 To facilitate the characterization of DEG sets and significant modules, GO  
771 enrichment analyses were performed using the Fisher’s Exact Test function in Blast2GO  
772 v5.2.5 (Conesa et al., 2005) with the GO annotations extracted from Ernst and  
773 Westerman (2021). In each case, all genes in the expression set (for the WGCNA  
774 analysis, all genes that were used in the co-expression analysis) for the respective tissue  
775 were used as the reference set, and an FDR threshold of  $<0.05$  was set to identify  
776 significantly enriched GO terms. All DEG sets and significant modules were tested for  
777 GO enrichment.

778 To further explore the differences between male and female tissues for each  
779 condition, we used GOExpress v1.20.0 (Rue-Albrecht et al., 2016) to identify GO terms  
780 that best classify the samples from two groups (e.g., female trained brains and male  
781 trained brains) based on their gene expression profiles. For these analyses, reads were  
782 first normalized to counts per million (CPM) with edgeR v3.28.1 (Robinson et al., 2010),  
783 and only genes with  $\geq 1$  CPM for at least 10 samples (the maximum number of replicates  
784 per group) were retained for the input expression matrix. The random forest was set to  
785 10,000 trees, and GO terms that were associated with at least five genes and with a p-  
786 value  $<0.05$  after 1,000 permutations were considered significant.

787

### 788 *Identification of wing patterning genes*

789           In addition to examining differential expression, co-expression networks, and GO  
790 signatures, we also investigated the expression patterns of known wing patterning genes,  
791 as these genes have been hypothesized to act as “magic genes” and to have the capacity  
792 to influence both preference as well as the preferred trait (Servedio, 2009; Smadja and  
793 Butlin, 2011; Westerman, 2019). Specifically, we used the functional annotations and  
794 butterfly wing patterning gene list from Ernst and Westerman (2021) to identify wing  
795 patterning genes expressed in eye and brain tissue and to determine if they were  
796 differentially expressed between the sexes. The genes included numerous *B. anynana*  
797 wing patterning genes (Beldade and Peralta, 2017; Bhardwaj et al., 2018; Connahs et al.,  
798 2019; Matsuoka and Monteiro, 2018; Monteiro et al., 2013; Monteiro et al., 2006;  
799 Monteiro and Prudic, 2010; Ozsu et al., 2017; Prakash and Monteiro, 2018, 2020; Saenko  
800 et al., 2011), as well as genes characterized in other butterfly species (Ficarrotta et al.,  
801 2022; Martin and Reed, 2010; Nadeau et al., 2016; Reed et al., 2011; Westerman et al.,  
802 2018; Woronik et al., 2019).

803

#### 804 *Analysis of Behavior*

805           We first conducted a Shapiro-Wilk test to assess normality of the behavioral data.  
806 We then performed a Kruskal-Wallis test to examine the effect of sex on behavior,  
807 followed by a second Kruskal-Wallis test subset by treatment (naïve, trained, trainer) to  
808 test for the effect of sex on behavior in each treatment. We conducted a principal  
809 components analysis (PCA) on behavior to search for hidden correlations and create new  
810 composite variables (S39 Table). We then performed a Kruskal-Wallis test to test for the

811 effect of sex on PC1, PC2, and PC3. We calculated a Bonferroni correction to account for  
812 multiple testing, producing an adjusted significance value of  $p = 0.0025$ .

813

#### 814 *Ethical Note*

815 All *B. anynana* butterflies were maintained in laboratory conditions as specified  
816 by U.S. Department of Agriculture APHIS permit P526P-17-00343. Butterflies not used  
817 for this experiment were maintained with ample food and water until natural death.

818

#### 819 **Acknowledgements**

820 We thank Matthew Murphy, Grace Hirzel, Deonna Robertson, and Sushant Potdar  
821 for assistance with animal husbandry. This research was supported by NSF IOS grant  
822 #1937201 to ELW, an Arkansas Biosciences Institute (the major research component of  
823 the Arkansas Tobacco Settlement Proceeds Act of 2000) grant to ELW, a University of  
824 Arkansas Honors College grant to GAA & ELW, the Arkansas High Performance  
825 Computing Center, which is funded through multiple NSF grants and the Arkansas  
826 Economic Development Commission, and the University of Arkansas.

827

828 **Competing Interests:** The authors declare no competing interests.

829

830 **Data Availability:** All raw sequence data associated with this study are accessible  
831 through the NCBI Sequence Read Archive (SRA) database under XXX. Behavioral data  
832 are available at Dryad Database XXXX. All other data presented in this study are  
833 available within this manuscript and its Supplemental Information.

## 834 Literature Cited

835

- 836 Alward BA, Balthazart J, Ball GF, 2013. Differential effects of global versus local  
837 testosterone on singing behavior and its underlying neural substrate. *Proceedings*  
838 *of the National Academy of Sciences* 110:19573-19578. doi:  
839 10.1073/pnas.1311371110.
- 840 Alward BA, Cornil CA, Balthazart J, Ball GF, 2018. The regulation of birdsong by  
841 testosterone: Multiple time-scales and multiple sites of action *Hormones and*  
842 *Behavior* 104:32-40. doi: 10.1016/j.yhbeh.2018.04.010.
- 843 Anders S, Pyl PT, Huber W, 2015. HTSeq— a Python framework to work with high-  
844 throughput sequencing data *Bioinformatics* 31:166-169. doi:  
845 10.1093/bioinformatics/btu.
- 846 Arikawa K, Stavenga DG, 2014. Insect photopigments: Photoreceptor spectral  
847 sensitivities and visual adaptations In: Hunt DMea, editor. *Evolution of Visual*  
848 *and Non-visual Pigments* New York: Springer Science + Business p. 137-162.
- 849 Bacquet PMB, Brattstrom O, Wang H-L, Allen C, Lofstedt C, Brakefield PM, Nieberding  
850 CM, 2015. Selection on male sex pheromone composition contributes to butterfly  
851 reproductive isolation *Proceedings of the Royal Society of London B*  
852 282:20142734. doi: 10.1098/rspb.2014.2734.
- 853 Beldade P, Peralta CM, 2017. Developmental and evolutionary mechanisms shaping  
854 butterfly eyespots *Current Opinion in Insect Science* 19:22-29. doi:  
855 10.1016/j.cois.2016.10.006.
- 856 Beldade P, Rudd S, Gruber JD, Long AD, 2006. A wing expressed sequence tag  
857 resource for *Bicyclus anynana* butterflies, an evo-devo model. *BMC Genomics*  
858 7. doi: 10.1186/1471-2164-7-130.
- 859 Benjamini Y, Hochberg Y, 1995. Controlling the false discovery rate: a practical and  
860 powerful approach to multiple testing *Journal of the Royal Statistical Society*  
861 *Series B (Methodological)* 57:289-300.
- 862 Bhardwaj S, Prudic KL, Bear A, Dasgupta M, Wasik BR, Tong X, Cheong WF, Wenk  
863 MR, Monteiro A, 2018. Sex Differences in 20-Hydroxyecdysone hormone levels  
864 control sexual dimorphism in *Bicyclus anynana* wing patterns *Molecular Biology*  
865 *and Evolution* 35:465-472. doi: 10.1093/molbev/msx301.
- 866 Bloch NI, Corral-López A, Buechel SD, Kotrschal A, Kolm N, Mank JE, 2018. Early  
867 neurogenomic response associated with variation in guppy female mate  
868 preference *Nature Ecology and Evolution* 2:1772-1781. doi: 10.10378/s41559-  
869 018-0682-4.
- 870 Bolger AM, Lohse M, Usadel B, 2014. Trimmomatic: a flexible trimmer for Illumina  
871 sequence data *Bioinformatics* 30:2114-2120. doi: 10.1093/bioinformatics/btu170.
- 872 Brakefield PM, Reistma N, 1991. Phenotypic plasticity, seasonal climate and the  
873 population biology of *Bicyclus* butterflies (Satyridae) in Malawi. *Ecological*  
874 *Entomology* 16:291-303.
- 875 Brunetti CR, Selegue JE, Monteiro A, French V, Brakefield PM, Carroll SB, 2001. The  
876 generation and diversification of butterfly eyespot color patterns *Current Biology*  
877 11:1578-1585. doi: 10.1016/S0960-9822(01)00502-4.

- 878 Buerkle N, Westerman EL, Kronforst MR, Palmer SE, 2022. Sex-limited diversification  
879 of the eye in *Heliconius* butterflies bioRxiv. doi: 10.1101/2022.04.25.489414.
- 880 Byers KJRP, Barragh K, Musgrove J, Almeida DA, Garza SF, Warren IA, Rastas PM,  
881 Kucka M, Chan YF, Merrill RM, Schultz S, McMillan WO, Jiggins CD, 2020. A  
882 major locus controls a biologically active pheromone component in *Heliconius*  
883 *melpomene*. *Evolution* 74:349-364. doi: 10.1111/evo.13922.
- 884 Byrne PG, Rice WR, 2006. Evidence for adaptive male mate choice in the fruit fly  
885 *Drosophila melanogaster* *Proceedings of the Royal Society of London B*  
886 273:917-922. doi: 10.1098/rspb.2005.3372.
- 887 Conesa A, Götz S, García-Gómez JM, Terol J, Talón M, Robles M, 2005. Blast2GO: a  
888 universal tool for annotation, visualization and analysis in functional genomics  
889 research *Bioinformatics* 21:3674-3676. doi: 10.1093/bioinformatics/bti610.
- 890 Connahs H, Tlili S, van Creijl J, Loo TYJ, Banerjee TD, Saunders TE, Monteiro A, 2019.  
891 Activation of butterfly eyespots by Distal-less is consistent with a reaction-  
892 diffusion process. *Development* 146:146. doi: 10.1242/dev.169367.
- 893 Costanzo K, Monteiro A, 2007. The use of chemical and visual cues in female choice in  
894 the butterfly *Bicyclus anynana*. *Proceedings of the Royal Society of London B*  
895 274:845-851.
- 896 Datta SR, Vasconcelos ML, Ruta V, Luo S, Wong A, Demir E, Flores J, Balonze K,  
897 Dickson BJ, Axel R, 2008. The *Drosophila* pheromone cVA activates a sexually  
898 dimorphic neural circuit. *Nature* 452. doi: 10.1038/nature06808.
- 899 Dauwalder B, Tsujimoto S, Moss J, Mattox W, 2002. The *Drosophila* takeout gene is  
900 regulated by the somatic sex-determination pathway and affects male courtship.  
901 *Genes & Development* 16:2879-2892. doi: 10.1101/gad.1010302.
- 902 de Jong MA, Collins SL, Beldade P, Brakefield PM, Zwaan BJ, 2013. Footprints of  
903 selection in wild populations of *Bicyclus anynana* along a latitudinal cline.  
904 *Molecular Ecology* 22:341-353. doi: 10.1111/mec.12114.
- 905 Dobin A, Davis CA, Schlesinger F, Drenkow J, Zaleski C, Jha S, Batut P, Chaisson M,  
906 Gingeras TR, 2013. STAR: ultrafast universal RNA-seq aligner. *Bioinformatics*  
907 29:15-21. doi: 10.1093/bioinformatics/bts635.
- 908 Edwards AC, Zwartz L, Yamamoto A, Callaerts P, Mackay TFC, 2009. Mutations in  
909 many genes affect aggressive behavior in *Drosophila melanogaster*. *BMC*  
910 *Biology* 7:29. doi: 10.1186/1741-7007-7-29.
- 911 Ehl S, Hostert K, Korsch J, Gros P, Schmitt T, 2018. Sexual dimorphism in the alpine  
912 butterflies *Boloria pales* and *Boloria napaea*: differences in movement and  
913 foraging behavior (Lepidoptera: Nymphalidae). *Insect Science* 25:1089-1101. doi:  
914 10.1111/1744-7917.12494.
- 915 Ernst DA, Westerman EL, 2021. Stage- and sex-specific transcriptome analyses reveal  
916 distinctive sensory gene expression patterns in a butterfly *BMC Genomics*. doi:  
917 10.1186/s12864-021-07819-4.
- 918 Everett A, Tong X, Briscoe AD, Monteiro A, 2012. Phenotypic plasticity in opsin  
919 expression in a butterfly compound eye complements sex role reversal. *BMC*  
920 *Evolutionary Biology* 12:232.
- 921 Ficarrota V, Hanly JJ, Loh LS, Francescutti CM, Ren A, Tunström K, Wheat CW, Porter  
922 AH, Counterman BA, Martin A, 2022. A genetic switch for male UV-iridescence



- 923 in an incipient species pair of sulphur butterflies Proceedings of the National  
924 Academy of Sciences 119:e2109255118. doi: 10.1073/pnas.2109255118.
- 925 Ghalambor CK, Hoke KL, Ruell EW, Fischer EK, Reznick DN, Hughes KA, 2015. Non-  
926 adaptive plasticity potentiates rapid adaptive evolution of gene expression in  
927 nature Nature 372:372-375. doi: 10.1038/nature15256.
- 928 Gobes SMH, ter Haar SM, Vignal C, Vergne AL, Mathevon N, Bolhuis JJ, 2009.  
929 Differential responsiveness in brain and behavior to sexually dimorphic long calls  
930 in male and female zebra finches. The Journal of Comparative Neurology  
931 516:312-320. doi: 10.1002/cne.22113.
- 932 Goebrecht GKE, Kowtoniuk RA, Kelly BG, Kittelberger JM, 2014. Sexually-dimorphic  
933 expression of tyrosine hydroxylase immunoreactivity in the brain of a vocal  
934 teleost fish (*Porichthys notatus*). Journal of Chemical Neuroanatomy 56:13-34.  
935 doi: 10.1016/j.jchemneu.2014.01.001.
- 936 Greenwood PJ, 1980. Mating systems, philopatry and dispersal in birds and mammals.  
937 Animal Behaviour 28:1140-1162.
- 938 Gurney ME, Konishi M, 1980. Hormone-induced sexual differentiation of brain and  
939 behavior in zebra finches Science 208:1380-1383.
- 940 Hashikawa K, Hashikawa Y, Lischinsky J, Lin D, 2018. The neural mechanisms of  
941 sexually dimorphic aggressive behaviors Trends in Genetics 34:755-776. doi:  
942 10.1016/j.tig.2018.07.001.
- 943 Immelmann K, 1975. Ecological significance of imprinting and early learning. Annual  
944 Review of Ecology and Systematics 6:15-37.
- 945 Kendrick KM, Haupt MA, Hinton MR, Broad KD, Skinner JD, 2001. Sex differences in  
946 the influence of mothers on the sociosexual preferences of their offspring.  
947 Hormones and Behavior 40:322-338. doi: 10.1006/hbeh.2001.1672.
- 948 Kokko H, Johnstone RA, 2002. Why is mutual mate choice not the norm? Operational  
949 sex ratios, sex roles and the evolution of sexually dimorphic and monomorphic  
950 signalling. Philosophical transactions of the Royal Society B 357:319-330. doi:  
951 10.1098/rstb.2001.0926.
- 952 Kronforst MR, Papa R, 2015. The functional basis of wing patterning in *Heliconius*  
953 butterflies: The molecules behind mimicry. Genetics 200:1-19. doi:  
954 10.1534/genetics.114.172387.
- 955 Kronforst MR, Young LG, Kapan DD, McNeely C, O'Neill RJ, Gilbert LE, 2006.  
956 Linkage of butterfly mate preference and wing color preference cue at the  
957 genomic location of wingless. Proceedings of the National Academy of Sciences  
958 of the United States of America 103:6575-6580.
- 959 Kunte K, Zhang W, Tenger-Trolander A, Palmer DH, Martin A, Reed RD, Mullen SP,  
960 Kronforst MR, 2014. *doublesex* is a mimicry supergene. Nature 507:229-234. doi:  
961 10.1038/nature13112.
- 962 Lande R, 1980. Sexual dimorphism, sexual selection, and adaptation in polygenic  
963 characters. Evolution 34:292-305.
- 964 Langfelder P, Horvath S, 2008. WGCNA: an R package for weighted correlation network  
965 analysis. BMC Bioinformatics 9:559. doi: 10.1186/1471-2105-9-559.
- 966 Lee J, Yoo E, Lee H, Park K, Hur J, Lim C, 2017. LSM12 and ME31B/DDX6 define  
967 distinct modes of posttranscriptional regulation by ATAXIN-2 protein complex in

- 968 *Drosophila* circadian pacemaker neurons Molecular Cell 66:129-140. doi:  
969 10.1016/j.molcel.2017.03.004.
- 970 Li P, Chaurasia SS, Gao Y, Carr AL, Iuvone PM, Li L, 2008. CLOCK is required for  
971 maintaining the circadian rhythms of opsin mRNA expression in photoreceptor  
972 cells The Journal of Biological Chemistry 283:31673-31678. doi:  
973 10.1074/jbc.M803875200.
- 974 Li P, Temple S, Gao Y, Haimberger TJ, Hawryshyn CW, Li L, 2005. Circadian rhythms  
975 of behavioral cone sensitivity and long wavelength opsin mRNA expression: a  
976 correlation study in zebrafish Journal of Experimental Biology 208:497-504. doi:  
977 10.1242/jeb.01424.
- 978 London A, Benhar I, Schwartz M, 2013. The retina as a window to the brain — from eye  
979 research to CNS disorders. Nature Reviews Neurology 9:44-53. doi:  
980 10.1038/nrneurol.2012.227.
- 981 Love MI, Huber W, Anders S, 2014. Moderated estimation of fold change and dispersion  
982 for RNA-seq data with DESeq2. Genome Biology 15:550. doi: 10.1186/s13059-  
983 014-0550-8.
- 984 Macias-Muñoz A, Smith G, Monteiro A, Briscoe AD, 2015. Transcriptome-wide  
985 differentail expression in *Bicyclus anynana* butterflies: Female vision-related  
986 genes are more plastic. Molecular Biology and Evolution. doi:  
987 10.1093/molbev/msv197.
- 988 Martin A, Reed RD, 2010. *wingless* and *artistaless2* define a developmental ground plan  
989 for moth and butterfly wing pattern evolution Molecular Biology and Evolution  
990 27:2864-2878. doi: 10.1093/molbev/msq173.
- 991 Matsuoka Y, Monteiro A, 2018. Melanin pathway genes regulate color and morphology  
992 of butterfly wing scales Cell Reports 24:56-65. doi: 10.1016/j.celrep.2018.05.092.
- 993 Merrill RM, Dasmahapatra KK, Davey JW, Dell'Aglio DD, Hanly JJ, Huber B, Jiggins  
994 CD, Joron M, Kozak KM, Llaurens V, Marin SH, Montgomery SH, Morris J,  
995 Nadeau NJ, Pinharanda AL, Rosser N, Thompson MJ, Vanjari S, Wallbank RWR,  
996 Yu Q, 2015. The diversification of *Heliconius* butterflies: what have we learned in  
997 150 years? Journal of Evolutionary Biology 28:1417-1438. doi:  
998 10.1111/jeb.12672.
- 999 Merrill RM, Rastas P, Martin SH, Melo MC, Barker S, Davey JW, McMillan WO,  
1000 Jiggins CD, 2019. Genetic dissection of assortative mating behavior. PLoS  
1001 Biology 17:e2005902. doi: 10.1371/journal.pbio.2005902.
- 1002 Monteiro A, Chen B, Ramos DM, Oliver JC, Tong X, Guo M, Wang W, Fazzino L,  
1003 Kamal F, 2013. Distal-Less regulates eyespot patterns and melanization in  
1004 *Bicyclus* butterflies. Journal of Experimental Zoology Part B 320B:321-331.
- 1005 Monteiro A, Glaser G, Stockslager S, Glansdorp N, Ramos D, 2006. Comparative  
1006 insights into questions of lepidopteran wing pattern homology. BMC  
1007 Developmental Biology 6:52. doi: 10.1186/1471-213X-6-52.
- 1008 Monteiro A, Prudic KL, 2010. Multiple approaches to study color pattern evolution in  
1009 butterflies Trends in Evolutionary Biology 2. doi: 10.4081/eb.2010.e2.
- 1010 Morandin C, Hietala A, Helanterä H, 2019. Vitellogenin and vitellogenin-like gene  
1011 expression patterns in relation to caste and task in the ant *Formica fusca*. Insectes  
1012 Sociaux 66:519-531. doi: 10.1007/s00040-019-00725-9.

- 1013 Nadeau NJ, Pardo-Diaz C, Whibley A, Supple MA, Saenko SV, Wallbank RWR, Wu  
1014 GC, Maroja L, Ferguson L, Hanly JJ, Hines H, Salazar C, Merrill RM, Dowling  
1015 AJ, ffrench-Constant RH, Llaurens V, Joron M, McMillan WO, Jiggins CD, 2016.  
1016 The gene *cortex* controls mimicry and crypsis in butterflies and moths *Nature*  
1017 534:106-110. doi: 10.1038/nature17961.
- 1018 Naisbit RE, Jiggins CD, Mallet J, 2001. Disruptive sexual selection against hybrids  
1019 contributes to speciation between *Heliconius cydno* and *Heliconius melpomene*.  
1020 *Proceedings of the Royal Society of London B* 268:1849-1854. doi:  
1021 10.1098/rspb.2001.1753.
- 1022 Nelson CM, Ihle KE, Fondrk MK, Page RE, Amdam GV, 2007. The gene *vitellogenin*  
1023 has multiple coordinating effects on social organization *PLoS Biology* 5:e62. doi:  
1024 10.1371/journal.pbio.0050062.
- 1025 Nieberding CM, de Vos H, Schneider MV, Lassance J, Estramil N, Andersson J, Bang J,  
1026 Hedenstrom E, Lofstedt C, Brakefield PM, 2008. The male sex pheromone of the  
1027 butterfly *Bicyclus anynana*: Towards an evolutionary analysis. *PLoS ONE*  
1028 3:e2751-.
- 1029 Nieberding CM, Fischer K, Saastamoinen M, Allen CE, Wallin EA, Hedenstrom E,  
1030 Brakefield PM, 2012. Cracking the olfactory code of a butterfly: the scent of  
1031 ageing. *Ecology Letters* 15:415-424. doi: 10.1111/j.1461-0248.2012.01748.x.
- 1032 Nowell RW, Elsworth B, V. O, Zwaan BJ, Wheat CW, Saastamoinen M, Saccheri IJ,  
1033 van't Hof AE, Wasik BR, Connahs H, Aslam ML, Kumar S, Challis RJ, Monteiro  
1034 A, Brakefield PM, Blaxter ML, 2017. A high-coverage draft genome of the  
1035 mycalesine butterfly *Bicyclus anynana*. *Giga Science* 6:1-7. doi:  
1036 10.1093/gigascience/gix035.
- 1037 Obara Y, Koshitaka H, Arikawa K, 2008. Better mate in the shade: enhancement of male  
1038 mating behavior in the cabbage butterfly, *Pieris rapae crucivora*, in a UV-rich  
1039 environment. *Journal of Experimental Biology* 211:3698-3702.
- 1040 Ogawa Y, Kinoshita M, Stavenga DG, Arikawa K, 2013. Sex-specific retinal  
1041 pigmentation results in sexually dimorphic ling-wavelength-sensitive  
1042 photoreceptors in the eastern pale clouded yellow butterfly, *Colias erate*. *The*  
1043 *Journal of Experimental Biology* 216:1916-1923. doi: 10.1242/jeb.083485.
- 1044 Olson CR, Hodges LK, Mello CV, 2015. Dynamic gene expression in the song system of  
1045 zebra finches during the song learning period. *Developmental Neurobiology*  
1046 75:1315-1338. doi: 10.1002/dneu.2286.
- 1047 Ozsu N, Chan QY, Chen B, Das Gupta M, Monteiro A, 2017. *Wingless* is a positive  
1048 regulator of eyespot color patterns in *Bicyclus anynana* butterflies *Developmental*  
1049 *Biology* 429:177-185. doi: 10.1016/j.ydbio.2017.06.030.
- 1050 Ozsu N, Monteiro A, 2017. Wound healing, calcium signaling, and other novel pathways  
1051 are associated with the formation of butterfly eyespots *BMC Genomics* 18:788.  
1052 doi: 10.1186/s12864-017-4175-7.
- 1053 Perry CJ, Barron AB, Chittka L, 2017. The frontiers of insect cognition *Current Opinion*  
1054 *in Behavioral Sciences* 16:111-118. doi: 10.1016/j.cobeha.2017.05.011.
- 1055 Pradhan A, Olsson P, 2015. Zebrafish sexual behavior: role of sex steroid hormones and  
1056 prostaglandins. *Behavioral and Brain Functions* 11:23. doi: 10.1186/s12993-015-  
1057 0068-6.

- 1058 Prakash A, Monteiro A, 2018. apterous A specifies dorsal wing patterns and sexual traits  
1059 in butterflies Proceedings of the Royal Society of London B 285:20172685. doi:  
1060 10.1098/rspb.2017.2685.
- 1061 Prakash A, Monteiro A, 2020. *Doublesex* mediates the development of sex-specific  
1062 pheromone organs in *Bicyclus* butterflies via multiple mechanisms. Molecular  
1063 Biology and Evolution 37:1694-1707. doi: 10.1093/molbev/msaa039.
- 1064 Prudic KL, Jeon C, Cao H, Monteiro A, 2011. Developmental plasticity in sexual roles of  
1065 butterfly species drives mutual sexual ornamentation. Science 331:73-75. doi:  
1066 10.1126/science.1197114.
- 1067 Quillfeldt P, Schroff S, van Noordwijk HJ, Michalik A, Ludynia K, Masello JF, 2011.  
1068 Flexible foraging behaviour of a sexually dimorphic seabird: large males do not  
1069 always dive deep. Marine Ecology Progress Series 428:271-287. doi:  
1070 10.3354/meps09058.
- 1071 Reed RD, Papa R, Martin A, Hines HM, Counterman BA, Pardo-Diaz C, Jiggins CD,  
1072 Chamberlain NL, Kronforst MR, Chen R, Halder G, Nijhout HF, McMillan WO,  
1073 2011. *optix* drives the repeated convergent evolution of butterfly wing pattern  
1074 mimicry. Science 333:1137-1141. doi: 10.1126/science.1208227.
- 1075 Reedy AM, Pope BD, Kiriazis NM, Giordano CL, Sams CL, Warner DA, Cox RM, 2017.  
1076 Female anoles display less but attack more quickly than males in response to  
1077 territorial intrusions Behavioral Ecology 28:1323-1328. doi:  
1078 10.1093/beheco/arx095.
- 1079 Rideout EJ, Billeter J, Goodwin SF, 2007. The sex-determination genes *fruitless* and  
1080 *doublesex* specify a neural substrate required for courtship song. Current Biology  
1081 17:1473-1478. doi: 10.1016/j.cub.2007.07.047.
- 1082 Robinson MD, McCarthy DJ, Smyth GK, 2010. edgeR: a Bioconductor package for  
1083 differential expression analysis of digital gene expression data Bioinformatics  
1084 26:139-140. doi: 10.1093/bioinformatics/btp616.
- 1085 Rodriguez-Caro F, Fenner J, Bhardwayj S, Cole JA, Benson C, Colombara AM, Papa R,  
1086 Brown MW, Martin A, Range RC, Counterman BA, 2021. Novel doublesex  
1087 duplication associated with sexually dimorphic development of dogface butterfly  
1088 wings Molecular Biology and Evolution 38:5021-5033. doi:  
1089 10.1093/molbev/msab228.
- 1090 Rosell F, Thomsen LR, 2006. Sexual dimorphism in territorial scent marking by adult  
1091 Eurasian beavers (*Castor fiber*). Journal of Chemical Ecology 32:1301-1315. doi:  
1092 10.1007/s10886-006-9087-y.
- 1093 Roy-Zokan EM, Cunningham CB, Hebb LE, McKinney EC, Moore AJ, 2015.  
1094 Vitellogenin and vitellogenin receptor gene expression is associated with male  
1095 and female parenting in a subsocial insect Proceedings of the Royal Society of  
1096 London B 282:20150787. doi: 10.1098/rspb.2015.0787.
- 1097 Rue-Albrecht K, McGettigan PA, Hernández B, Nalpas NC, Magee DA, A.C. P, Gordon  
1098 SV, MacHugh DE, 2016. GOexpress: an R/Bioconductor package for the  
1099 identification and visualisation of robust gene ontology signatures through  
1100 supervised learning of gene expression data BMC Bioinformatics 17:126. doi:  
1101 10.1186/s12859-016-0971-3.

- 1102 Ruta V, Datta SR, Vasconcelos ML, Freeland J, Looger LL, Axel R, 2010. A dimorphic  
1103 pheromone circuit in *Drosophila* from sensory input to descending output. *Nature*  
1104 468:686-692. doi: 10.1038/nature09554.
- 1105 Saenko SV, Marialva MSP, Beldade P, 2011. Involvement of the conserved Hox gene  
1106 Antennapedia in the development and evolution of a novel trait. *EvoDevo* 2:9.  
1107 doi: 10.1186/2041-9139-2-9.
- 1108 Sakai Y, Kawamura S, Kawata M, 2018. Genetic and plastic variation in opsin gene  
1109 expression, light sensitivity, and female response to visual signals in the guppy  
1110 *Proceedings of the National Academy of Sciences* 115:12247-12252. doi:  
1111 10.1073/pnas.1706730115.
- 1112 Servedio MR, 2009. The role of linkage disequilibrium in the evolution of premating  
1113 isolation *Heredity* 102:51-56. doi: 10.1038/hdy.2008.98.
- 1114 Servedio MR, Van Doorn GS, Kopp M, Frame AM, Nosil P, 2011. Magic traits in  
1115 speciation: ‘magic’ but not rare? *Trends in Ecology & Evolution* 26:389-397. doi:  
1116 10.1016/j.tree.2011.04.005.
- 1117 Shannon G, Page BR, Duffy KJ, Slotow R, 2006. The role of foraging behaviour in the  
1118 sexual segregation of the African elephant *Oecologia* 150:344-354. doi:  
1119 10.1007/s00442-006-0521-1.
- 1120 Shannon P, Markiel A, Ozier O, Baliga NS, Wang JT, Ramage D, Amin N, Schwikowski  
1121 B, Ideker T, 2003. Cytoscape: a software environment for integrated models of  
1122 biomolecular interaction networks. *Genome Research* 13:2498-2504.
- 1123 Slonim DK, 2002. From patterns to pathways: gene expression data analysis comes of  
1124 age *Nature Genetics* 32:502-508. doi: 10.1038/ng1033.
- 1125 Smadja CM, Butlin RK, 2011. A framework for comparing processes of speciation in the  
1126 presence of gene flow *Molecular Ecology* 20:5123-5140. doi: 10.1111/j.1365-  
1127 294X.2011.05350.x.
- 1128 Stavenga DG, 2002. Reflections on colourful ommatidia of butterfly eyes *Journal of*  
1129 *Experimental Biology* 205:1077-1085.
- 1130 Stephens M, 2017. False discovery rates: a new deal. *Biostatistics* 18:275-294. doi:  
1131 10.1093/biostatistics/kxw041.
- 1132 Talyn BC, Dowse HB, 2004. The role of courtship song in sexual selection and species  
1133 recognition by female *Drosophila melanogaster*. *Animal Behaviour* 68:1165-  
1134 1180. doi: 10.1016/j.anbehav.2003.11.023.
- 1135 ten Cate C, 1985. On sex differences in sexual imprinting. *Animal Behaviour* 33:1310-  
1136 1317.
- 1137 ten Cate C, Vos DR, 1999. Sexual imprinting and evolutionary processes in birds: a  
1138 reassessment. *Advances in the Study of Behavior* 28:1-31.
- 1139 Trivers RL, 1972. Parental investment and sexual selection. In: Campbell B, editor.  
1140 *Sexual Selection and the Descent of Man, 1871-1971* Chicago: Aldine-Atherton.  
1141 p. 136-179.
- 1142 Trochet A, Courtois EA, Stevens VM, Baguette M, Chainé A, Schmeller DS, Clobert J,  
1143 2016. Evolution of sex-biased dispersal. *The Quarterly Review of Biology*  
1144 91:297-320.
- 1145 van Schooten B, Meléndez-Rosa J, Van Belleghem SM, Jiggins CD, Tan JD, McMillan  
1146 WO, Papa R, 2020. Divergence of chemosensing during the early stages of

- 1147 speciation *Proceedings of the National Academy of Sciences* 117:16438-16447.  
1148 doi: 10.1073/pnas.1921318117.
- 1149 Verzijden MN, Korthof REM, ten Cate C, 2008. Females learn from mothers and males  
1150 learn from others. The effect of mother and siblings on the development of female  
1151 mate preferences and male aggression biases in Lake Victoria cichlids, genus  
1152 Mbipia. *Behavioral Ecology and Sociobiology* 62:1359-1368. doi:  
1153 10.1007/s00265-008-0564-x.
- 1154 Verzijden MN, ten Cate C, Servedio MR, Kozak GM, Boughman JW, Svensson EI,  
1155 2012. The impact of learning on sexual selection. *Trends in Ecology and*  
1156 *Evolution* 27:511-519. doi: 10.1016/j.tree.2012.05.007.
- 1157 Wang Y, Rensink A, Fricke U, Riddle MC, Trent C, van de Zande L, Verhulst EC, 2020.  
1158 Sexually dimorphic traits and allele-specific differentiation are actively regulated by  
1159 Doublesex during specific developmental windows in *Nasonia vitripennis*  
1160 bioRxiv. doi: 10.1101/2020.04.19.048553.
- 1161 Westerman E, 2019. Searching for the genes driving assortative mating *PLoS Biology*  
1162 17:e3000108. doi: 10.1371/journal.pbio.3000108.
- 1163 Westerman E, Hodgins-Davis A, Dinwiddie A, Monteiro A, 2012. Biased learning affects  
1164 mate choice in a butterfly. *Proceedings of the National Academy of Sciences of*  
1165 *the United States of America* 109:10948-10953. doi: 10.1073/pnas.1118378109.
- 1166 Westerman E, Monteiro A, 2013. Odour influences whether females learn to prefer or to  
1167 avoid wing patterns of male butterflies. *Animal Behaviour* 86:1139-1145. doi:  
1168 10.1016/j.anbehav.2013.09.002.
- 1169 Westerman EL, Chirathivat N, Schyling E, Monteiro A, 2014. Mate preference for a  
1170 phenotypically plastic trait is learned, and may facilitate preference-phenotype  
1171 matching. *Evolution* 68:1661-1670.
- 1172 Westerman EL, VanKuren N, Massardo D, Buerkle N, Tenger-Trolander A, Zhang W,  
1173 Hill R, Perry M, Bayala E, Chamberlain N, Douglas T, Palmer S, Kronforst MR,  
1174 2018. Aristaless controls butterfly wing color variation used in mimicry and mate  
1175 choice *Current Biology* 28:3469-3474.e3464. doi: 10.1016/j.cub.2018.051.
- 1176 Witte K, Sawka N, 2003. Sexual imprinting on a novel trait in the dimorphic zebra finch:  
1177 sexes differ. *Animal Behaviour* 65:165-203. doi: 10.1006/anbe.2002.2009.
- 1178 Woodgate JL, Buchanan KL, Bennett ATD, Catchpole CK, Birgton R, Leitner S, 2014.  
1179 Environmental and genetic control of brain and song structure in the zebra finch.  
1180 *Evolution* 68:230-240. doi: 10.1111/evo.12261.
- 1181 Woronik A, Tunström K, Perry MW, Neethiraj R, Stefanescu C, Celorio-Mancera M,  
1182 Brattstrom O, Hill J, Lehmann P, Käkälä R, Wheat CW, 2019. A transposable  
1183 element insertion is associated with an alternative life history strategy *Nature*  
1184 *Communications* 10:5757. doi: 10.1038/s41467-019-13596-2.
- 1185 Wright DS, van Eijk R, Schuart L, Seehausen O, Groothuis TGG, Maan ME, 2020.  
1186 Testing sensory drive speciation in cichlid fish: linking light conditions to opsin  
1187 expression, opsin genotype and female mate preference *Journal of Evolutionary*  
1188 *Biology* 33:422-434. doi: 10.1111/jeb.13577.
- 1189 Zilkha N, Scott N, Kimchi T, 2017. Sexual dimorphism of parental care: from genes to  
1190 behavior *Annual Review of Neuroscience* 40:273-305. doi: 10.1146/annurev-  
1191 neuro-072116-031447.  
1192
